# Supplementary material for: Comparisons of genome assembly tools for characterization of Mycobacterium tuberculosis genomes using hybrid sequencing technologies
Source: PeerJ. 2024 Aug 29;12:e17964. doi: 10.7717/peerj.17964 (PMC11366230; doi:10.7717/peerj.17964)
Supplement: Supplemental Information 1 [file peerj-12-17964-s001.xlsx]

## Sheet: Table S1
Supplemental Table S1 The phenotypic drug susceptibility test based on proportional method and minimum inhibitory concentration (MIC) test of one MDR-TB and eight pre-XDR-TB isolates from our previous study.
						Sample Accession (.fastq)			Genome Accession (.fasta)							Drug resistant types			Isoniazid				Rifampicin				Ethambutol				Streptomycin				Kanimycin				Amikacin				Ofloxacin				Moxifloxacin
No.	SampleID	Sex	Isolate year	Patient age	Geographic location	Illumina	Nanopore	Pacbio	I assembly	IN assembly	IP assembly	INP assembly	AFB Smear	Lineage	RD type	Agar proportion	MYBOTB	WGS	Agar proportion (CC = 0.2 µg/ml)	MYCOTB (CC = 0.25 µg/ml)	MIC (µg/ml)	WGS	Agar proportion (CC = 1 µg/ml)	MYCOTB (CC = 1 µg/ml)	MIC (µg/ml)	WGS	Agar proportion (CC = 5 µg/ml)	MYCOTB (CC = 4 µg/ml)	MIC (µg/ml)	WGS	Agar proportion (CC = 2 µg/ml)	MYCOTB (CC = 2 µg/ml)	MIC (µg/ml)	WGS	Agar proportion (CC = 6 µg/ml)	MYCOTB (CC = 5 µg/ml)	MIC (µg/ml)	WGS	Agar proportion (CC = 6 µg/ml)	MYCOTB (CC = 4 µg/ml)	MIC (µg/ml)	WGS	Agar proportion (CC = 2 µg/ml)	MYCOTB (CC = 2 µg/ml)	MIC (µg/ml)	WGS	Agar proportion (CC = 2 µg/ml)	MYCOTB (CC = 1 µg/ml)	MIC (µg/ml)
1	15966	Male	2007	30	Thailand	SAMN13735008	SAMN37563188	SAMN37563197	CP135987	CP136197	CP158166	CP157906	2+	2.2.1	RD105;RD207;RD181	Pre-XDR-TB	Pre-XDR-TB	Pre-XDR-TB	R	R	1	katG Ser315Thr	R	R	2	rpoB Leu452Pro	R	R	8	embB Met306Val	S	R	4	rpsL Lys88Arg	R	R	10	eis -8 c/a	S	S	0.5	No AMK matation	R	R	8	gyrA Asp94His	R	R	2
2	17688	Male	2008	NA	Thailand	SAMN13735017	SAMN37563189	SAMN37563198	CP136189	CP136198	CP158167	CP157907	3+	2.2.1	RD105;RD207;RD181	Pre-XDR-TB	Pre-XDR-TB	Pre-XDR-TB	R	R	1	katG Ser315Thr	R	R	>16.00	rpoB Ser450Leu	R	S	4	embB Met306Ile	R	R	>32	rpsL Lys43Arg	R	R	>40	rrs A1401G	R	R	>16	rrs A1401G	R	R	16	gyrA Asp94Gly	R	R	4
3	25474	Male	2012	54	Thailand	SAMN13735031	SAMN37563190	SAMN37563199	CP136190	CP136199	CP158168	CP157908	3+	2.2.1.1	RD105;RD207;RD181;RD150	Pre-XDR-TB	Pre-XDR-TB	Pre-XDR-TB	R	R	>4	fabG1 -8 t/c, katG Ser315Thr	R	R	>16.00	rpoB Ser450Leu	NA	S	4	embB Met306Ile	R	R	>32	rpsL Lys43Arg	R	R	>40	rrs A1401G	R	R	>16	rrs A1401G	R	R	16	gyrA Asp94Gly	S	R	4
4	29366	Male	2011	31	Thailand	SAMN13735027	SAMN37563191	SAMN37563200	CP136191	CP136200	CP158169	CP157909	2+	2.1	RD105;None	Pre-XDR-TB	Pre-XDR-TB	Pre-XDR-TB	R	R	4	katG Ser315Thr	R	R	>16.00	rpoB Ser450Leu, rpoC Leu527Val	R	R	8	embB Met306Ile	R	R	8	gid Gly73Ala	R	R	>40	rrs A1401G	R	R	>16	rrs A1401G	R	R	16	gyrA Asp94Gly	R	R	4
5	37032	Male	2014	31	Thailand	SAMN13735693	SAMN37563192	SAMN37563201	CP136192	CP136201	CP158170	CP157910	3+	2.2.1	RD105;RD207;RD181	Pre-XDR-TB	Pre-XDR-TB	Pre-XDR-TB	R	R	2	katG Ser315Thr	R	R	>16.00	rpoB Ser450Leu	S	S	4	embB Gly406Asp	R	R	>32	rpsL Lys43Arg	S	S	1.2	No KAN mutation	S	S	0.25	No AMK matation	R	R	8	gyrA Asp94Ala	S	R	2
6	37446	Male	2014	39	Thailand	SAMN13735698	SAMN37563193	SAMN37563202	CP136193	CP136202	CP158171	CP157911	3+	4.5	RD122	Pre-XDR-TB	Pre-XDR-TB	Pre-XDR-TB	R	R	1	katG Ser315Thr	R	R	2	rpoB His445Leu	R	S	2	embB Met306Ile	S	S	0.5	No STR mutation	S	S	2.5	No KAN mutation	S	S	0.25	No AMK matation	R	R	8	gyrA Ala90Val	S	R	2
7	40543	Male	2015	50	Thailand	SAMN13735704	SAMN37563194	SAMN37563203	CP136194	CP136203	CP158172	CP157912	ND	2.2.1	RD105;RD207;RD181	Pre-XDR-TB	Pre-XDR-TB	Pre-XDR-TB	R	R	4	katG Ser315Thr	R	R	8	rpoB Asp435Val	S	S	1	No EMB mutation	R	R	>32	rpsL Lys43Arg	R	R	>40	rrs A1401G	R	R	>16	rrs A1401G	R	R	16	gyrA Asp94Gly	S	R	4
8	40579	Female	2015	42	Thailand	SAMN13735705	SAMN37563195	SAMN37563204	CP136195	CP136204	CP158173	CP157913	3+	2.2.1	RD105;RD207;RD181	MDR-TB	MDR-TB	MDR-TB	R	R	>4	katG Ser315Thr	R	R	>16.00	rpoB Asp435Val	R	S	4	No EMB mutation	R	R	>32	rpsL Lys88Arg	R	R	>40	rrs A1401G	R	R	>16	rrs A1401G	S	S	1	No FQ mutation	S	S	0.12
9	40868	Male	2015	50	Thailand	SAMN14417277	SAMN37563196	SAMN37563205	CP136196	CP136205	CP158174	CP157914	ND	2.2.1	RD105;RD207;RD181	Pre-XDR-TB	ND	Pre-XDR-TB	R	ND	ND	katG Ser315Asn	R	ND	ND	rpoB His445Tyr	R	ND	ND	No EMB mutation	S	ND	ND	No STR mutation	S	ND	ND	No KAN mutation	ND	ND	ND	No AMK matation	R	ND	ND	gyrA Ala90Val	R	ND	ND
NA: Not available data, ND: Not done
[truncated: 14 more columns]

## Sheet: Table S2
Supplemental Table S2 The average depth of sequencing coverage of one MDR-TB and eight pre-XDR-TB isolates among three sequencing platforms.
			Median depth of coverage (X)
No.	Drug resistant types	SampleID	Illumina	Nanopore	Pacbio	Average
1	PreXDR-TB	15966	59	200	255	171.333
2	PreXDR-TB	17688	57	240	45	114
3	PreXDR-TB	25474	113	260	145	172.667
4	PreXDR-TB	29366	60	272	90	140.667
5	PreXDR-TB	37032	382	241	131	251.333
6	PreXDR-TB	37446	407	251	187	281.667
7	PreXDR-TB	40543	375	251	125	250.333
8	MDR-TB	40579	293	282	237	270.667
9	PreXDR-TB	40868	335	326	111	257.333
		Average	231.222	258.111	147.333

## Sheet: Table S3
Supplemental Table S3 The performance evaluation and accuracy of the RagOut genome assemblies.
Assembly	Genome size (bp)	Aligned bases (%Accuracy)	Unaligned bases (%Errors)	Average alignments identity with reference (%)	Total SNPs	Total Indels			%Accuracy
I15966	4416758	4202111 (95.1402%)	214647 (4.8598%)	99.9354	1459	837			I	IN	IP	INP
I17688	4430117	4200282 (94.8120%)	229835 (5.1880%)	99.9289	1419	963		Mean	0.966165	0.992165	0.988375	0.988375
I25474	4424835	4303876 (97.2664%)	120959 (2.7336%)	99.9104	1885	1368
I29366	4411897	4174696 (94.6236%)	237201 (5.3764%)	99.9157	1452	1125		one-way ANOVA test	p-values	F
I37032	4428600	4304632 (97.2007%)	123968 (2.7993%)	99.9118	1655	1377			< 0.001*	16.8778
I37446	4407806	4337376 (98.4022%)	70430 (1.5978%)	99.9334	938	951
I40543	4430659	4310110 (97.2792%)	120549 (2.7208%)	99.9045	1962	1617		post-hoc test	p-values
I40579	4409581	4291730 (97.3274%)	117851 (2.6726%)	99.9093	1609	1365			IvsIN	IvsIP	IvsINP
I40868	4424057	4313324 (97.4970%)	110733 (2.5030%)	99.9073	2002	1579			< 0.001*	< 0.001*	< 0.001*
IN15966	4401767	4377224 (99.4424%)	24543 (0.5576%)	99.8854	1858	2472
IN17688	4402557	4376530 (99.4088%)	26027 (0.5912%)	99.882	1875	2359		Note: * = statistically significant, I = Illumina assembly, IN = Illumina+ONT assembly, IP = Illumina+PacBio assembly, INP = Illumina+ONT+PacBio assembly.
IN25474	4414055	4392495 (99.5116%)	21560 (0.4884%)	99.8999	2106	1630
IN29366	4422807	4338737 (98.0992%)	84070 (1.9008%)	99.893	1812	2172
IN37032	4422517	4361819 (98.6275%)	60698 (1.3725%)	99.9065	1839	1453
IN37446	4431145	4408251 (99.4833%)	22894 (0.5167%)	99.9315	1107	875
IN40543	4420062	4393680 (99.4031%)	26382 (0.5969%)	99.9011	2131	1552
IN40579	4419214	4396717 (99.4909%)	22497 (0.5091%)	99.9045	1828	1402
IN40868	4418471	4395574 (99.4818%)	22897 (0.5182%)	99.9023	2186	1558
IP15966	4409638	4366196 (99.0148%)	43442 (0.9852%)	99.8601	2032	3393
IP17688	4417797	4314222 (97.6555%)	103575 (2.3445%)	99.8712	2110	3075
IP25474	4425619	4380654 (98.9840%)	44965 (1.0160%)	99.9058	2036	1359
IP29366	4418077	4319890 (97.7776%)	98187 (2.2224%)	99.8698	1930	2924
IP37032	4429026	4382709 (98.9542%)	46317 (1.0458%)	99.9105	1913	1358
IP37446	4430612	4407772 (99.4845%)	22840 (0.5155%)	99.9287	1109	907
IP40543	4415430	4375645 (99.0990%)	39785 (0.9010%)	99.9031	2080	1562
IP40579	4416618	4383830 (99.2576%)	32788 (0.7424%)	99.8888	2035	1961
IP40868	4403054	4372682 (99.3102%)	30372 (0.6898%)	99.9065	2097	1503
INP15966	4409638	4366196 (99.0148%)	43442 (0.9852%)	99.8601	2032	3393
INP17688	4417797	4314222 (97.6555%)	103575 (2.3445%)	99.8712	2110	3075
INP25474	4425619	4380654 (98.9840%)	44965 (1.0160%)	99.9058	2036	1359
INP29366	4418077	4319890 (97.7776%)	98187 (2.2224%)	99.8698	1930	2924
INP37032	4429026	4382709 (98.9542%)	46317 (1.0458%)	99.9105	1913	1358
INP37446	4430612	4407772 (99.4845%)	22840 (0.5155%)	99.9287	1109	907
INP40543	4415430	4375645 (99.0990%)	39785 (0.9010%)	99.9031	2080	1562
INP40579	4416618	4383830 (99.2576%)	32788 (0.7424%)	99.8888	2035	1961
INP40868	4403054	4372682 (99.3102%)	30372 (0.6898%)	99.9065	2097	1503

## Sheet: Table S4
Supplemental Table S4 The gene sets identified from the Venn diagram (Figure 3A) (Illumina assemblies).
Genes identified from Illumina assemblies (n=1006)	Annotation
group_1064	Phthiodiolone/phenolphthiodiolone dimycocerosates ketoreductase
group_1074	Putative uncharacterized protein
group_1076	hypothetical protein
group_1087	hypothetical protein
group_1088	hypothetical protein
group_1092	hypothetical protein
group_1095	hypothetical protein
group_1098	hypothetical protein
group_1104	tRNA-Pro(cgg)
group_1107	putative protein
group_1114	2-succinylbenzoate--CoA ligase
group_1117	hypothetical protein
group_1124	Putative S-adenosyl-L-methionine-dependent methyltransferase
group_1127	hypothetical protein
PE5	PE family immunomodulator PE5
group_1140	Putative 3-methyladenine DNA glycosylase
group_1141	putative protein
group_1159	putative membrane protein
group_1164	6-hydroxy-D-nicotine oxidase
group_1170	hypothetical protein
group_1171	hypothetical protein
group_1172	hypothetical protein
group_1175	putative zinc-binding alcohol dehydrogenase
group_1184	hypothetical protein
group_1188	hypothetical protein
group_1191	putative enoyl-CoA hydratase echA12
group_1194	hypothetical protein
group_1196	putative protein
group_1197	hypothetical protein
group_1200	hypothetical protein
group_1205	hypothetical protein
group_1208	hypothetical protein
group_1209	hypothetical protein
group_1210	hypothetical protein
group_1211	putative membrane protein
group_1213	putative glycosyltransferase
group_1216	hypothetical protein
group_1217	putative protein
group_1226	putative protein
group_1238	hypothetical protein
group_1239	hypothetical protein
group_1247	Universal stress protein
group_1250	hypothetical protein
group_1251	putative PPE family protein PPE40
group_1252	hypothetical protein
group_1254	hypothetical protein
group_1257	hypothetical protein
dap_4	D-aminopeptidase
group_1260	Carotenoid cleavage oxygenase
group_1271	tRNA-Pro(ggg)
group_1272	hypothetical protein
group_1273	KsdD-like steroid dehydrogenase
group_1277	hypothetical protein
group_1279	hypothetical protein
group_1280	Putative antitoxin VapB12
group_1282	hypothetical protein
group_1287	hypothetical protein
group_1290	putative protein
group_1293	hypothetical protein
group_1294	hypothetical protein
group_1295	putative ABC transporter ATP-binding protein
group_1296	Ribonuclease VapC13
group_1297	hypothetical protein
group_1307	hypothetical protein
group_1308	dITP/XTP pyrophosphatase
group_1309	hypothetical protein
group_1312	hypothetical protein
group_1323	putative protein
group_1333	putative polyglutamine synthesis accessory protein
group_1334	putative proteinA
group_1353	hypothetical protein
group_136	hypothetical protein
group_1361	putative protein
group_1365	hypothetical protein
group_1367	PPE family protein PPE41
group_1368	hypothetical protein
group_1372	hypothetical protein
group_1373	putative HTH-type transcriptional regulator
group_1381	hypothetical protein
group_1384	hypothetical protein
group_1385	F420H(2)-dependent quinone reductase
group_1392	hypothetical protein
group_1394	hypothetical protein
group_1395	hypothetical protein
group_1400	Ribonuclease VapC21
group_1414	hypothetical protein
group_1415	hypothetical protein
group_1421	hypothetical protein
group_1428	hypothetical protein
group_1429	hypothetical protein
group_1434	hypothetical protein
group_1437	Secreted chorismate mutase
group_1439	Antitoxin VapB15
group_1440	hypothetical protein
group_1442	putative protein
group_1447	hypothetical protein
group_145	hypothetical protein
group_1451	hypothetical protein
group_1454	hypothetical protein
group_1469	hypothetical protein
group_1470	hypothetical protein
group_1477	hypothetical protein
group_1492	hypothetical protein
group_1493	hypothetical protein
group_1501	hypothetical protein
group_1506	putative protein
group_1509	Putative antitoxin VapB10
group_1517	hypothetical protein
group_1518	PE family protein PE13
group_1521	putative protein
group_1524	hypothetical protein
group_1532	hypothetical protein
group_1533	hypothetical protein
group_1535	hypothetical protein
group_1540	hypothetical protein
group_1548	hypothetical protein
group_1550	hypothetical protein
group_1553	hypothetical protein
group_1557	tRNA-Leu(taa)
group_1568	putative proteinA
group_1572	hypothetical protein
group_1574	hypothetical protein
group_1577	hypothetical protein
group_1585	Putative S-adenosyl-L-methionine-dependent methyltransferase
group_1586	putative acyl-CoA dehydrogenase fadE25
group_1588	Putative fatty-acid--CoA ligase fadD25
group_159	Phenolphthiocerol synthesis polyketide synthase type I Pks15/1
group_1593	putative protein
group_1595	5S ribosomal RNA (partial)
group_1596	hypothetical protein
group_1597	hypothetical protein
group_1604	putative proteinA
group_1605	putative protein
group_1609	hypothetical protein
group_161	putative protein
group_1611	hypothetical protein
group_1615	Putative fatty-acid--CoA ligase fadD25
group_1623	hypothetical protein
group_1626	Ribonuclease VapC35
group_1628	putative protein
group_1629	Antitoxin VapB22
group_163	Acyl-CoA dehydrogenase FadE34
group_1632	hypothetical protein
group_1633	hypothetical protein
group_1636	Putative antitoxin VapB19
group_1647	hypothetical protein
group_1648	Phenolphthiocerol synthesis polyketide synthase type I Pks15/1
group_1649	hypothetical protein
group_1652	hypothetical protein
group_1655	hypothetical protein
group_1656	hypothetical protein
group_1657	hypothetical protein
group_1662	Decaprenyl-phosphate phosphoribosyltransferase
group_1663	hypothetical protein
group_1665	tRNA-Asn(gtt)
group_1671	Antitoxin VapB28
group_1673	hypothetical protein
group_1687	hypothetical protein
group_1691	hypothetical protein
group_1700	putative HTH-type transcriptional regulator
group_1703	hypothetical protein
group_1706	hypothetical protein
group_1710	hypothetical protein
group_1718	putative protein
group_1719	Putative DNA-binding proteinA
group_1721	hypothetical protein
group_1723	hypothetical protein
group_1733	hypothetical protein
group_1739	hypothetical protein
group_1743	hypothetical protein
group_1751	hypothetical protein
group_1754	hypothetical protein
group_1755	hypothetical protein
group_1758	hypothetical protein
group_1760	hypothetical protein
group_1766	hypothetical protein
group_1767	hypothetical protein
group_1773	hypothetical protein
group_1775	hypothetical protein
group_1776	hypothetical protein
group_1777	putative protein
group_1780	Putative conjugal transfer protein
group_1787	putative protein
group_1794	hypothetical protein
group_1797	hypothetical protein
group_1799	hypothetical protein
group_1810	hypothetical protein
group_1812	Putative S-adenosyl-L-methionine-dependent methyltransferase
group_1815	Ribonuclease VapC44
mutB	putative methylmalonyl-CoA mutase large subunit
group_1821	PE family protein PE13
group_1824	hypothetical protein
group_1827	hypothetical protein
group_1834	hypothetical protein
group_1835	Magnesium transporter MgtE
group_1838	hypothetical protein
group_1845	putative HTH-type transcriptional regulator
group_1846	hypothetical protein
group_1847	hypothetical protein
group_1848	hypothetical protein
group_1852	hypothetical protein
group_1862	hypothetical protein
group_1863	hypothetical protein
group_1864	hypothetical protein
group_1865	hypothetical protein
group_1866	hypothetical protein
group_1868	hypothetical protein
group_1870	putative protein
group_1875	hypothetical protein
group_1901	hypothetical protein
group_1910	hypothetical protein
group_1918	Putative peptidoglycan hydrolase
group_1919	hypothetical protein
group_1920	Putative prophage phiRv2 integrase
group_1921	hypothetical protein
group_1930	hypothetical protein
group_1931	Ribonuclease VapC43
group_1933	GDSL-like esterase
group_1935	putative protein
group_1938	Putative monooxygenase
group_1944	Ribonuclease VapC42
group_1948	Metal reductase
group_1951	hypothetical protein
group_1953	hypothetical protein
group_1960	putative protein
group_1968	putative protein
group_1971	hypothetical protein
group_1975	hypothetical protein
group_1978	hypothetical protein
group_1982	putative MFS-type transporter
group_1984	putative protein
group_2001	Monoacylglycerol lipase
group_2005	hypothetical protein
group_2016	hypothetical protein
group_2025	AP-4-A phosphorylase
group_2031	hypothetical protein
group_2033	hypothetical protein
group_2034	Ribonuclease VapC32
group_2037	hypothetical protein
group_2039	hypothetical protein
group_2043	hypothetical protein
group_2047	hypothetical protein
group_2049	putative GTPase
group_2050	putative protein
group_2058	putative protein
group_2063	Putative succinyl-CoA transferase
group_2069	Fumarate reductase flavoprotein subunit
group_2072	putative protein
group_2073	hypothetical protein
group_2076	hypothetical protein
group_2096	hypothetical protein
group_2098	hypothetical protein
group_2099	Ribonuclease VapC31
group_2100	hypothetical protein
group_2103	hypothetical protein
group_2113	hypothetical protein
group_2121	hypothetical protein
group_2124	hypothetical protein
group_2125	hypothetical protein
group_2132	hypothetical protein
group_2137	putative HTH-type transcriptional regulator
group_2140	hypothetical protein
group_2148	putative protein
group_2156	hypothetical protein
group_2157	hypothetical protein
group_2163	Diterpene synthase
group_2168	hypothetical protein
group_2177	putative protein
group_218	hypothetical protein
group_2180	hypothetical protein
group_2181	putative response regulatory protein
group_2183	hypothetical protein
group_2188	Catechol O-methyltransferase
group_2189	Putative CoA-transferase subunit beta
group_2192	putative protein
group_2194	hypothetical protein
group_2196	Immunogenic protein MPT64
group_220	hypothetical protein
group_2201	hypothetical protein
group_2204	Antitoxin VapB27
group_2220	hypothetical protein
group_2223	hypothetical protein
group_2229	hypothetical protein
group_2232	hypothetical protein
group_2244	hypothetical protein
group_2250	tRNA-Gly(gcc)
group_2251	putative HTH-type transcriptional regulator
group_2253	hypothetical protein
group_2255	hypothetical protein
group_2257	hypothetical protein
group_226	hypothetical protein
group_2262	Dodecin
group_2263	hypothetical protein
group_2264	hypothetical protein
group_2269	hypothetical protein
group_2271	hypothetical protein
group_2277	hypothetical protein
group_2279	hypothetical protein
group_228	hypothetical protein
group_2284	hypothetical protein
group_2293	hypothetical protein
group_2300	hypothetical protein
group_2302	hypothetical protein
group_2304	ISNCY family transposase ISBli16
group_2308	hypothetical protein
group_2315	putative proteinA
group_2318	hypothetical protein
group_2322	hypothetical protein
group_2326	hypothetical protein
group_2329	hypothetical protein
group_2330	hypothetical protein
group_2333	hypothetical protein
group_2342	Immunogenic protein MPT63
group_2344	hypothetical protein
group_2351	Putative dioxygenase
group_2356	Putative S-adenosyl-L-methionine-dependent methyltransferase
group_2369	hypothetical protein
group_237	hypothetical protein
group_2371	hypothetical protein
group_2377	hypothetical protein
group_2386	hypothetical protein
group_2390	putative ABC transporter permease
group_2394	hypothetical protein
group_2398	Putative cytochrome P450 135A1
group_240	Long-chain-fatty-acid--AMP ligase FadD30
group_2402	hypothetical protein
group_2406	hypothetical protein
group_2412	hypothetical protein
group_242	hypothetical protein
group_2428	hypothetical protein
group_2430	hypothetical protein
group_2431	putative HTH-type transcriptional regulator
group_2433	putative HTH-type transcriptional regulator
group_2435	putative PPE family protein PPE40
group_244	putative PPE family protein PPE20
group_2446	Putative ligase
group_2447	hypothetical protein
group_245	putative protein
group_2450	hypothetical protein
group_2453	hypothetical protein
group_2456	putative protein
group_246	hypothetical protein
group_2462	hypothetical protein
group_2465	hypothetical protein
group_2467	hypothetical protein
group_2470	hypothetical protein
group_248	hypothetical protein
group_2483	putative protein
group_2487	putative protein
group_2488	hypothetical protein
group_2489	hypothetical protein
group_2495	hypothetical protein
group_2498	putative protein
group_250	putative protein
group_2508	hypothetical protein
group_2512	hypothetical protein
group_2513	PE-PGRS family protein PE_PGRS11
group_2525	34 kDa antigenic protein
group_2530	35 kDa protein
group_2533	putative protein
group_2538	hypothetical protein
group_2539	hypothetical protein
group_2550	putative oxidoreductase
group_2554	hypothetical protein
group_2560	hypothetical protein
group_2562	hypothetical protein
group_2564	hypothetical protein
group_2566	hypothetical protein
group_2570	Acyl-CoA dehydrogenase FadE34
group_2573	hypothetical protein
group_2574	putative protein
group_2580	hypothetical protein
group_2582	hypothetical protein
group_2586	hypothetical protein
group_2590	Low molecular weight antigen MTB12
group_2591	hypothetical protein
group_2593	(2E,6E)-farnesyl diphosphate synthase
group_2598	hypothetical protein
group_2600	putative HTH-type transcriptional regulator
group_261	putative protein
group_2616	hypothetical protein
group_2618	hypothetical protein
group_2622	hypothetical protein
group_2625	hypothetical protein
group_2640	hypothetical protein
group_2641	hypothetical protein
group_2642	Putative cytochrome P450 126
group_2643	hypothetical protein
group_2644	hypothetical protein
group_2646	hypothetical protein
group_2649	hypothetical protein
group_2652	Immunogenic protein MPT64
group_2654	hypothetical protein
group_2656	hypothetical protein
group_2665	Putative methyltransferase
group_2670	hypothetical protein
group_2674	hypothetical protein
group_2677	putative membrane protein
group_269	hypothetical protein
group_2692	hypothetical protein
group_2694	Ribonuclease VapC30
group_2701	tRNA-Arg(ccg)
group_2702	hypothetical protein
group_2703	Putative quercetin 2,3-dioxygenase
group_2713	putative protein
group_272	putative protein
group_2721	putative protein
group_2725	hypothetical protein
group_2740	hypothetical protein
group_2741	hypothetical protein
group_2743	hypothetical protein
group_2747	putative protein
group_2748	putative protein
group_2757	hypothetical protein
group_2762	hypothetical protein
group_2765	hypothetical protein
group_2767	hypothetical protein
group_277	putative protein
group_2773	hypothetical protein
group_2778	hypothetical protein
group_2786	hypothetical protein
group_2788	putative protein
group_2790	hypothetical protein
group_2793	hypothetical protein
group_2795	Ribonuclease VapC48
group_2799	Antitoxin VapB21
group_2802	hypothetical protein
group_2809	putative oxidoreductase
group_281	putative protein
group_2812	putative protein
group_2815	hypothetical protein
group_2816	hypothetical protein
group_2818	hypothetical protein
group_2819	putative protein
group_2821	Putative S-adenosyl-L-methionine-dependent methyltransferase
group_2825	hypothetical protein
group_2826	hypothetical protein
group_2827	hypothetical protein
group_2831	hypothetical protein
group_2837	hypothetical protein
group_2846	hypothetical protein
group_2849	hypothetical protein
group_2850	Phosphatase
group_2853	hypothetical protein
group_2854	putative protein
group_2861	hypothetical protein
group_2864	Ribonuclease VapC47
group_2868	hypothetical protein
group_2873	hypothetical protein
group_2879	hypothetical protein
group_2880	putative protein
group_2884	Transcriptional regulator
group_2886	hypothetical protein
group_2888	hypothetical protein
group_2893	putative protein
group_2894	hypothetical protein
group_2897	hypothetical protein
group_2909	hypothetical protein
group_2914	hypothetical protein
group_2915	dTDP-4-amino-4,6-dideoxyglucose formyltransferase
group_2916	hypothetical protein
group_292	putative protein
group_2922	hypothetical protein
group_2926	putative membrane protein
group_2936	hypothetical protein
group_2941	tRNA-Gly(gcc)
group_2943	hypothetical protein
group_2945	putative CoA-transferase
group_2953	hypothetical protein
group_2969	Putative acyl-CoA dehydrogenase FadE17
group_2972	hypothetical protein
group_2979	PPE family protein PPE15
group_298	hypothetical protein
group_2984	hypothetical protein
group_2991	putative protein
group_3003	putative protein
group_301	hypothetical protein
group_3010	tRNA-Pro(tgg)
group_3012	hypothetical protein
group_302	hypothetical protein
group_3021	hypothetical protein
group_3022	ISNCY family transposase ISRjo3
group_3025	hypothetical protein
group_303	5-formyltetrahydrofolate cyclo-ligase
group_3037	hypothetical protein
group_3046	hypothetical protein
group_3047	putative HTH-type transcriptional regulator
group_3048	putative protein
group_3056	hypothetical protein
group_3059	putative enoyl-CoA hydratase echA12
group_306	hypothetical protein
group_3062	hypothetical protein
group_3063	hypothetical protein
group_3067	hypothetical protein
group_3069	Toxin
group_3078	hypothetical protein
group_3081	hypothetical protein
group_3082	hypothetical protein
group_3084	hypothetical protein
group_3086	hypothetical protein
group_3091	hypothetical protein
group_3108	hypothetical protein
group_3115	putative protein
group_3117	putative protein
group_3119	hypothetical protein
group_3122	Polyprenol-phosphate-mannose-dependent alpha-(1-2)-phosphatidylinositol mannoside mannosyltransferase
group_313	hypothetical protein
group_314	hypothetical protein
group_3141	hypothetical protein
group_3143	hypothetical protein
group_3145	hypothetical protein
group_3154	Antitoxin VapB11
group_3159	hypothetical protein
group_3160	hypothetical protein
group_3161	hypothetical protein
group_3165	Thioredoxin-like reductase
group_3168	hypothetical protein
group_3170	hypothetical protein
group_3171	putative SufE-like protein
group_3172	23S rRNA-specific endonuclease VapC20
group_3188	hypothetical protein
group_319	hypothetical protein
group_3193	Antitoxin VapB30
group_3195	Fluoroquinolones export permease protein
group_3197	putative protein
group_3198	Heme-binding protein
group_3199	putative oxidoreductase
group_3202	hypothetical protein
group_3204	hypothetical protein
group_3206	putative HTH-type transcriptional regulator
group_3208	ISNCY family transposase ISRjo3
group_3209	hypothetical protein
group_3217	hypothetical protein
group_3220	putative protein
group_3221	hypothetical protein
group_3228	Phthiotriol/phenolphthiotriol dimycocerosates methyltransferase
group_3229	Long-chain-fatty-acid--CoA ligase FadD17
group_3231	putative protein
group_3234	hypothetical protein
group_3238	hypothetical protein
group_3241	hypothetical protein
group_3242	hypothetical protein
group_325	Polyketide synthase-like Pks10
group_3252	tRNA-Thr(ggt)
group_3254	hypothetical protein
group_3256	putative protein
group_3257	hypothetical protein
group_3259	hypothetical protein
group_3264	hypothetical protein
group_3267	putative protein
group_3268	hypothetical protein
group_3269	putative protein
group_327	hypothetical protein
group_3275	putative glycosyltransferase
group_3276	Ribonuclease VapC51
group_3283	tRNA-Val(cac)
group_3286	putative protein
group_3288	hypothetical protein
group_3294	hypothetical protein
group_3297	hypothetical protein
group_330	hypothetical protein
group_3306	hypothetical protein
group_3307	Sensor histidine kinase component HK1
group_3311	tRNA-Val(gac)
group_3314	hypothetical protein
group_3317	putative glycosyl hydrolase
group_3320	hypothetical protein
group_3323	putative HTH-type transcriptional regulator
group_3324	hypothetical protein
group_3326	putative membrane protein
group_333	hypothetical protein
group_3330	hypothetical protein
group_3331	hypothetical protein
group_3332	hypothetical protein
group_3336	hypothetical protein
group_3337	Ribonuclease VapC49
group_3338	hypothetical protein
group_334	Cytochrome P450 144
group_3341	Protein
group_3346	hypothetical protein
group_3351	hypothetical protein
group_3355	hypothetical protein
group_3359	Ribonuclease VapC26
group_3360	hypothetical protein
group_3361	putative protein
group_3363	Antitoxin VapB41
group_3366	hypothetical protein
group_3368	PE-PGRS family protein PE25
group_3374	putative PPE family protein PPE42
group_3388	hypothetical protein
group_3395	hypothetical protein
group_3397	hypothetical protein
group_3401	hypothetical protein
group_3404	hypothetical protein
group_3406	hypothetical protein
group_3412	hypothetical protein
group_3418	hypothetical protein
group_3420	hypothetical protein
group_3423	4-hydroxy-2-oxovalerate aldolase
group_3429	putative proteinB
group_3432	hypothetical protein
group_3444	ISNCY family transposase ISMav10
group_3445	hypothetical protein
group_3446	hypothetical protein
group_3447	hypothetical protein
group_3449	hypothetical protein
pks1_1	Putative inactive phenolphthiocerol synthesis polyketide synthase type I Pks1
group_346	hypothetical protein
group_3471	putative PPE family protein PPE42
group_3473	hypothetical protein
group_3477	hypothetical protein
group_3479	hypothetical protein
group_348	putative protein
group_3482	putative protein
group_3485	Acyl-CoA dehydrogenase FadE29
group_349	putative glycosyl hydrolase
group_3493	hypothetical protein
group_3494	hypothetical protein
group_3496	putative oxidoreductase
group_3498	hypothetical protein
group_350	hypothetical protein
group_3501	Putative ATPase
group_3503	putative protein
group_3508	putative protein
group_3514	hypothetical protein
group_3519	putative ABC transporter ATP-binding protein
group_352	hypothetical protein
group_3523	hypothetical protein
group_3524	hypothetical protein
group_3526	hypothetical protein
group_3531	putative protein
group_3538	hypothetical protein
group_354	hypothetical protein
group_3540	Antitoxin VapB40
group_3541	Putative decaprenylphosphoryl-5-phosphoribose phosphatase
group_3542	2-methylcitrate dehydratase
group_3548	hypothetical protein
group_3549	hypothetical protein
group_355	hypothetical protein
group_3551	hypothetical protein
group_3561	hypothetical protein
group_3564	hypothetical protein
group_3569	hypothetical protein
group_357	hypothetical protein
group_3573	hypothetical protein
group_3579	hypothetical protein
group_3580	hypothetical protein
group_3582	putative protein
group_3586	hypothetical protein
group_3597	putative PPE family protein PPE36
group_360	putative protein
group_3604	S-(hydroxymethyl)mycothiol dehydrogenase
group_3605	putative monooxygenase
group_361	5'-3' exonuclease
group_3612	putative protein
group_3616	putative protein
group_3617	hypothetical protein
group_3623	hypothetical protein
group_3633	hypothetical protein
group_3634	hypothetical protein
group_3637	hypothetical protein
group_3643	hypothetical protein
group_3646	hypothetical protein
group_3652	hypothetical protein
group_3657	hypothetical protein
group_3667	hypothetical protein
group_3668	hypothetical protein
group_3670	hypothetical protein
group_3679	hypothetical protein
group_3680	putative protein
group_3688	hypothetical protein
group_3691	hypothetical protein
group_3692	hypothetical protein
group_3697	hypothetical protein
group_3703	putative sulfate transporter
group_3705	Corrinoid adenosyltransferase
group_3706	hypothetical protein
group_3712	hypothetical protein
group_3719	hypothetical protein
group_372	hypothetical protein
group_3724	hypothetical protein
group_373	hypothetical protein
group_3737	hypothetical protein
group_3741	Putative cytochrome P450 140
group_3744	hypothetical protein
group_3753	hypothetical protein
group_3754	hypothetical protein
group_3755	hypothetical protein
group_376	hypothetical protein
group_3761	hypothetical protein
group_3767	hypothetical protein
group_377	putative protein
group_3774	hypothetical protein
group_3776	putative HTH-type transcriptional regulator
group_3777	hypothetical protein
group_3783	hypothetical protein
group_3784	hypothetical protein
group_3786	hypothetical protein
group_3788	Long-chain-fatty-acid--CoA ligase FadD13
group_3798	hypothetical protein
group_3799	Alpha-(1->6)-mannopyranosyltransferase
group_3802	hypothetical protein
group_381	hypothetical protein
group_3812	PPE family protein PPE15
group_3816	hypothetical protein
group_3817	hypothetical protein
group_3819	hypothetical protein
group_382	putative HTH-type transcriptional regulator
group_3839	putative PPE family protein PPE51
group_3848	putative protein
group_385	Putative cystathionine beta-lyase
group_3864	hypothetical protein
group_3872	Carotenoid cleavage oxygenase
group_3874	hypothetical protein
group_3877	hypothetical protein
group_3878	Neutral ceramidase
group_3879	2-haloacrylate reductase
group_3882	hypothetical protein
group_3887	putative protein
group_3888	hypothetical protein
group_3898	putative HTH-type transcriptional regulator
group_3904	hypothetical protein
group_3912	Putative S-adenosyl-L-methionine-dependent methyltransferase
group_3914	Putative cytochrome P450 132
group_3916	hypothetical protein
group_3928	putative protein
group_394	hypothetical protein
group_3941	putative fatty acyl-CoA transferase
group_3944	hypothetical protein
group_3945	Steroid C26-monooxygenase
group_395	hypothetical protein
group_3953	hypothetical protein
group_3954	hypothetical protein
group_3956	putative FAD-linked oxidoreductase
group_3960	hypothetical protein
group_3962	hypothetical protein
group_3964	hypothetical protein
group_3968	hypothetical protein
group_3969	4-hydroxyphenylalkanoate adenylyltransferase
group_3970	Acyl-CoA dehydrogenase fadE12
group_3972	putative protein
group_3975	hypothetical protein
group_3976	hypothetical protein
group_3982	hypothetical protein
group_3990	hypothetical protein
group_3998	putative multidrug-efflux transporter
group_3999	Putative glyoxylase CFP32
group_400	hypothetical protein
group_4005	putative PPE family protein PPE17
group_4014	putative membrane protein
group_4016	putative protein
group_4017	Putative cytochrome P450 123
group_4025	hypothetical protein
group_4029	hypothetical protein
group_403	Universal stress protein
group_4037	hypothetical protein
group_4041	Putative cytochrome P450 136
group_4047	hypothetical protein
group_4049	Elongation factor G-like protein
group_405	hypothetical protein
group_4057	hypothetical protein
group_4059	hypothetical protein
group_4060	hypothetical protein
group_4065	putative protein
group_4071	putative NTE family protein
group_4074	hypothetical protein
group_4075	hypothetical protein
group_4078	Pyridoxal phosphate homeostasis protein
group_4079	Putative HTH-type transcriptional regulator
group_4085	putative protein
group_4091	hypothetical protein
group_4111	hypothetical protein
group_4112	hypothetical protein
group_4167	hypothetical protein
group_4168	hypothetical protein
group_4169	Putative serine esterase
group_4172	hypothetical protein
group_4174	hypothetical protein
group_4176	Putative aminoglycoside phosphotransferase
group_4177	putative oxidoreductase
group_4183	IS607 family transposase IS1538
group_4184	Putative S-adenosyl-L-methionine-dependent methyltransferase
group_4188	hypothetical protein
group_4192	hypothetical protein
group_4193	putative protein
group_4195	hypothetical protein
group_4244	hypothetical protein
group_4245	6-phosphogluconate dehydrogenase, NAD(+)-dependent, decarboxylating
group_4246	hypothetical protein
group_425	putative protein
group_4251	GTP cyclohydrolase 1 type 2
group_4256	hypothetical protein
group_4266	hypothetical protein
group_4267	hypothetical protein
group_4272	hypothetical protein
group_4277	putative HTH-type transcriptional regulator
group_4282	putative membrane protein
group_4290	Putative cytochrome P450 138
group_4294	Multidrug efflux ATP-binding/permease protein
group_4298	hypothetical protein
group_4303	Sarcosine/dimethylglycine N-methyltransferase
group_4307	putative protein
group_4317	putative protein
group_4319	hypothetical protein
group_4320	hypothetical protein
group_4322	Long-chain-fatty-acid--AMP ligase FadD32
group_4323	putative protein
group_4329	Putative acyl-CoA dehydrogenase FadE17
group_4332	hypothetical protein
group_4335	putative FAD-linked oxidoreductase
group_4336	hypothetical protein
group_434	putative protein
group_4342	putative protein
group_4344	CRISPR system single-strand-specific deoxyribonuclease Cas10/Csm1 (subtype III-A)
group_4346	hypothetical protein
group_4348	hypothetical protein
group_4352	hypothetical protein
group_4359	hypothetical protein
group_4360	IS607 family transposase IS1535
group_4367	hypothetical protein
group_4377	hypothetical protein
group_4378	hypothetical protein
group_438	hypothetical protein
group_4381	hypothetical protein
group_4382	putative SURF1-like protein
group_4383	Ribonuclease VapC27
group_4388	hypothetical protein
group_4390	hypothetical protein
group_4391	putative protein
group_4393	Transcriptional regulator
group_4394	hypothetical protein
group_4397	NADH dehydrogenase-like protein
group_4402	putative GMC-type oxidoreductase
group_4405	hypothetical protein
group_4406	putative cation efflux system protein
group_4418	hypothetical protein
group_4421	hypothetical protein
group_4423	hypothetical protein
group_4424	Methylmalonyl-CoA carboxyltransferase 12S subunit
group_4425	hypothetical protein
group_4427	2-haloacrylate reductase
group_4428	hypothetical protein
group_4430	(2Z,6E)-farnesyl diphosphate synthase
group_4431	putative protein
group_4432	hypothetical protein
group_4435	putative protein
group_4438	hypothetical protein
group_4439	hypothetical protein
group_4443	Ribonuclease VapC37
group_4445	Putative cytochrome P450 135B1
group_4446	hypothetical protein
group_4449	hypothetical protein
group_445	putative protein
group_4450	putative protein
group_4451	Antitoxin VapB47
group_4455	PE family protein PE13
group_4457	hypothetical protein
group_4461	hypothetical protein
group_4462	hypothetical protein
group_4466	hypothetical protein
group_4473	putative FAD-linked oxidoreductase
group_4475	putative PPE family protein PPE40
group_4478	hypothetical protein
group_450	hypothetical protein
group_451	PPE family protein PPE57
group_454	putative membrane protein
aes_4	Acetyl esterase
group_463	hypothetical protein
group_464	putative protein
group_473	hypothetical protein
group_482	hypothetical protein
group_492	hypothetical protein
ubiB_1	putative protein
group_149	hypothetical protein
group_200	hypothetical protein
esxK	ESAT-6-like protein EsxK
group_443	hypothetical protein
esxL	ESAT-6-like protein EsxL
group_498	hypothetical protein
group_539	hypothetical protein
group_546	putative protein
group_564	hypothetical protein
group_575	hypothetical protein
group_581	hypothetical protein
group_585	Multidrug efflux system permease protein
group_586	hypothetical protein
group_592	hypothetical protein
group_633	putative protein
group_643	putative PPE family protein PPE51
group_645	Putative S-adenosyl-L-methionine-dependent methyltransferase
group_650	hypothetical protein
group_651	hypothetical protein
group_653	hypothetical protein
group_656	hypothetical protein
group_688	putative PPE family protein PPE38
group_694	hypothetical protein
group_731	hypothetical protein
group_734	putative protein
group_752	hypothetical protein
group_753	hypothetical protein
group_758	hypothetical protein
group_761	Putative pterin-4-alpha-carbinolamine dehydratase
group_766	hypothetical protein
group_767	hypothetical protein
group_770	hypothetical protein
group_771	hypothetical protein
group_903	Baeyer-Villiger monooxygenase
group_436	putative PPE family protein PPE40
group_543	hypothetical protein
group_627	hypothetical protein
group_706	hypothetical protein
group_825	hypothetical protein
group_1002	PE-PGRS family protein PE_PGRS26
group_214	hypothetical protein
group_216	hypothetical protein
group_499	hypothetical protein
group_503	hypothetical protein
group_505	hypothetical protein
group_507	hypothetical protein
group_516	hypothetical protein
group_904	hypothetical protein
group_989	hypothetical protein
group_990	hypothetical protein
group_147	hypothetical protein
group_444	hypothetical protein
group_504	hypothetical protein
group_703	hypothetical protein
group_1043	hypothetical protein
group_202	D-aminopeptidase
group_458	hypothetical protein
group_208	hypothetical protein
group_502	hypothetical protein
group_510	hypothetical protein
group_519	hypothetical protein
group_525	hypothetical protein
group_526	hypothetical protein
group_538	hypothetical protein
group_542	hypothetical protein
group_555	hypothetical protein
group_558	hypothetical protein
group_567	hypothetical protein
group_568	hypothetical protein
group_571	hypothetical protein
group_605	hypothetical protein
group_607	hypothetical protein
fbpA_1	Diacylglycerol acyltransferase/mycolyltransferase Ag85A
group_621	hypothetical protein
group_625	Protein
group_629	hypothetical protein
group_689	hypothetical protein
group_692	hypothetical protein
group_705	hypothetical protein
group_722	hypothetical protein
rnpA	Ribonuclease P protein component
group_902	hypothetical protein
group_957	hypothetical protein
group_958	hypothetical protein
group_1053	hypothetical protein
group_151	hypothetical protein
group_203	D-aminopeptidase
group_489	hypothetical protein
group_509	IS110 family transposase ISArsp3
group_518	Long-chain-fatty-acid--CoA/3-oxocholest-4-en-26-oate--CoA ligase
group_537	hypothetical protein
group_601	hypothetical protein
group_647	hypothetical protein
group_648	hypothetical protein
group_713	hypothetical protein
group_714	hypothetical protein
group_772	hypothetical protein
group_967	hypothetical protein
group_1000	hypothetical protein
group_1001	putative protein
group_1003	hypothetical protein
group_1006	hypothetical protein
group_1009	hypothetical protein
group_1010	hypothetical protein
group_1014	hypothetical protein
group_1016	hypothetical protein
group_1020	Hydroxyacylglutathione hydrolase
group_1027	Putative diacyglycerol O-acyltransferase
group_1028	hypothetical protein
group_1034	hypothetical protein
group_1035	hypothetical protein
group_1036	hypothetical protein
group_1040	hypothetical protein
group_1044	hypothetical protein
group_1045	hypothetical protein
group_1048	hypothetical protein
group_1050	hypothetical protein
group_1054	hypothetical protein
cobM_1	Precorrin-4 C(11)-methyltransferase
group_146	hypothetical protein
group_164	Crotonobetainyl-CoA reductase
group_183	IS21 family transposase ISMt2
group_217	hypothetical protein
group_529	hypothetical protein
group_612	hypothetical protein
group_614	hypothetical protein
group_618	hypothetical protein
group_619	hypothetical protein
group_809	hypothetical protein
prfA_1	Peptide chain release factor 1
group_959	hypothetical protein
group_960	hypothetical protein
group_993	putative ABC transporter permease

## Sheet: Table S5
Supplemental Table S5 The gene sets identified from the Venn diagram (Figure 3A) (hybrid Illumina and ONT assemblies).
Genes identified from hybrid Illumina and ONT assemblies (n=1111)	Annotation
group_1021	putative protein
group_1022	hypothetical protein
group_1024	hypothetical protein
group_1032	hypothetical protein
group_106	hypothetical protein
group_1063	putative glycosyltransferase
group_1065	hypothetical protein
group_1066	hypothetical protein
group_1069	hypothetical protein
group_1073	Ribonuclease VapC29
group_1078	Antitoxin VapB27
group_1079	hypothetical protein
group_108	hypothetical protein
group_1083	putative protein
group_1085	hypothetical protein
group_1089	hypothetical protein
group_1096	hypothetical protein
group_1100	hypothetical protein
group_1101	hypothetical protein
group_1109	Immunity factor for TNT
group_111	hypothetical protein
group_1112	hypothetical protein
group_1113	Putative coenzyme F420-dependent oxidoreductase
group_1119	hypothetical protein
group_1121	Antitoxin VapB41
group_1126	hypothetical protein
group_1129	Acyl-CoA dehydrogenase FadE29
group_1130	hypothetical protein
group_1131	hypothetical protein
group_1132	putative protein
group_1133	tRNA-Leu(taa)
group_1143	hypothetical protein
group_1144	tRNA-Asn(gtt)
group_1147	hypothetical protein
group_1148	hypothetical protein
group_1151	hypothetical protein
group_116	hypothetical protein
group_1160	putative protein
group_1161	hypothetical protein
group_1162	putative metallo-hydrolase
group_1163	hypothetical protein
group_1174	putative protein
group_1176	hypothetical protein
group_1179	hypothetical protein
group_1180	putative HTH-type transcriptional regulator
group_1181	hypothetical protein
group_1192	putative HTH-type transcriptional regulator
group_1193	putative protein
group_1195	hypothetical protein
group_1201	hypothetical protein
group_1203	hypothetical protein
group_1218	Ribonuclease VapC21
group_1220	IS481 family transposase ISChy3
group_1221	Putative pterin-4-alpha-carbinolamine dehydratase
group_1223	putative protein
group_1231	hypothetical protein
group_1232	putative protein
group_1234	hypothetical protein
group_1244	hypothetical protein
group_1249	Putative enoyl-CoA hydratase EchA13
group_1253	hypothetical protein
group_1259	putative protein
group_126	hypothetical protein
group_1261	putative protein
group_1264	hypothetical protein
group_1265	hypothetical protein
group_1266	hypothetical protein
group_1269	hypothetical protein
group_1281	HTH-type transcriptional regulator
group_1284	hypothetical protein
group_1285	hypothetical protein
group_1286	hypothetical protein
group_1291	hypothetical protein
group_130	hypothetical protein
group_1300	hypothetical protein
group_1305	hypothetical protein
group_1311	hypothetical protein
group_1315	putative ABC transporter ATP-binding protein
group_1319	tRNA-Val(cac)
group_1320	Ribonuclease VapC39
group_1329	hypothetical protein
group_133	PPE family protein PPE34
group_1332	hypothetical protein
group_1338	hypothetical protein
group_1339	hypothetical protein
group_1340	Putative uncharacterized protein
group_1342	hypothetical protein
group_1346	D,L-glycerol 3-phosphate phosphatase
group_1348	hypothetical protein
group_1350	3'-5' exoribonuclease
group_1352	hypothetical protein
group_1354	hypothetical protein
group_1357	putative enoyl-CoA hydratase echA12
group_1360	hypothetical protein
group_1363	putative protein
group_1364	putative protein
group_1374	hypothetical protein
group_139	hypothetical protein
group_1391	2-methylcitrate dehydratase
PE5_1	PE family immunomodulator PE5
group_1393	hypothetical protein
group_1399	hypothetical protein
group_1401	hypothetical protein
group_1403	hypothetical protein
group_1404	Cytochrome P450 130
group_1405	hypothetical protein
group_1410	hypothetical protein
group_1411	putative Na(+)/H(+) exchanger
group_1412	hypothetical protein
group_1418	Immunogenic protein MPT64
group_1422	Putative antitoxin VapB10
group_1425	hypothetical protein
group_1426	hypothetical protein
group_1427	hypothetical protein
group_1432	hypothetical protein
group_1444	hypothetical protein
group_1450	Putative antitoxin VapB45
group_1453	hypothetical protein
group_1455	Ribonuclease VapC32
group_1459	hypothetical protein
group_1461	hypothetical protein
group_1462	hypothetical protein
group_1464	Antitoxin VapB26
group_1479	hypothetical protein
group_1482	hypothetical protein
group_1483	Alpha-pyrone synthesis polyketide synthase-like Pks18
group_1484	Ribonuclease VapC30
group_1486	putative N-acetyltransferase
group_1487	hypothetical protein
group_1488	hypothetical protein
group_1491	hypothetical protein
group_1502	putative ABC transporter ATP-binding protein
group_1504	hypothetical protein
group_1505	putative protein
group_1508	putative acyl-CoA dehydrogenase FadE10
group_1512	hypothetical protein
group_1523	hypothetical protein
group_1525	putative glycosyltransferase
group_1526	putative protein
group_1528	hypothetical protein
group_1539	hypothetical protein
group_1542	hypothetical protein
group_1544	Putative diacyglycerol O-acyltransferase
group_1545	hypothetical protein
group_1558	hypothetical protein
group_156	putative protein
group_1561	hypothetical protein
group_1562	putative protein
group_1563	hypothetical protein
group_1567	hypothetical protein
group_157	hypothetical protein
group_1570	putative protein
group_1573	hypothetical protein
group_1575	hypothetical protein
group_1579	hypothetical protein
group_1581	putative protein
group_1591	hypothetical protein
group_1607	hypothetical protein
group_1617	hypothetical protein
group_1620	hypothetical protein
group_1630	hypothetical protein
group_1635	hypothetical protein
group_1637	S-(hydroxymethyl)mycothiol dehydrogenase
group_1639	hypothetical protein
group_1641	hypothetical protein
group_1644	Bifunctional protein
group_1660	hypothetical protein
group_1666	putative protein
group_1667	Antitoxin VapB31
group_1669	hypothetical protein
group_1674	hypothetical protein
group_1675	putative MFS-type transporter
group_1677	putative PPE family protein PPE36
group_1684	HTH-type transcriptional repressor
group_1688	hypothetical protein
group_1690	Putative gluconeogenesis factor
group_1692	putative protein
group_1695	hypothetical protein
group_1697	hypothetical protein
group_1698	hypothetical protein
group_1707	pH-sensitive adenylate cyclase
group_171	hypothetical protein
group_1712	Steroid C26-monooxygenase
group_1714	putative oxidoreductase
group_1722	hypothetical protein
group_1730	putative proteinA
group_1731	Nucleoid-associated protein
group_1735	hypothetical protein
group_1737	hypothetical protein
group_1745	putative protein
group_1748	hypothetical protein
group_1750	Chorismate pyruvate-lyase
group_1757	hypothetical protein
group_1762	hypothetical protein
group_1768	hypothetical protein
group_1770	Protein
group_1771	hypothetical protein
group_178	putative PPE family protein PPE20
group_1784	hypothetical protein
group_1786	tRNA-His(gtg)
group_1790	hypothetical protein
group_1791	hypothetical protein
group_1793	hypothetical protein
group_1796	Putative enoyl-CoA hydratase EchA13
group_1798	hypothetical protein
group_180	hypothetical protein
group_1805	hypothetical protein
group_1807	Decaprenyl-phosphate phosphoribosyltransferase
group_1808	hypothetical protein
group_1809	Intracellular chorismate mutase
group_1813	hypothetical protein
group_1814	hypothetical protein
group_1817	hypothetical protein
group_1818	hypothetical protein
group_1819	hypothetical protein
group_1820	ISNCY family transposase ISBli16
group_1822	hypothetical protein
group_1825	34 kDa antigenic protein
group_1826	hypothetical protein
group_1828	putative protein
group_1832	putative protein
group_1837	Type B diterpene cyclase
group_1841	hypothetical protein
group_1843	hypothetical protein
group_1851	hypothetical protein
group_1867	putative proteinA
group_1871	hypothetical protein
group_1872	putative protein
group_1876	putative protein
group_1878	hypothetical protein
group_1886	hypothetical protein
group_1890	Putative fatty-acid--CoA ligase FadD10
group_1892	hypothetical protein
group_1894	hypothetical protein
group_1896	hypothetical protein
group_1897	hypothetical protein
group_1900	hypothetical protein
group_1903	Toxin
group_1908	hypothetical protein
group_1916	hypothetical protein
group_1917	putative protein
group_1928	hypothetical protein
group_1929	hypothetical protein
group_1937	putative proteinA
group_1940	hypothetical protein
group_1941	Universal stress protein
group_1942	hypothetical protein
group_1945	hypothetical protein
group_1946	Putative cytochrome P450 141
group_1947	hypothetical protein
group_1952	Putative secreted protein.1
pks1	Putative inactive phenolphthiocerol synthesis polyketide synthase type I Pks1
group_1956	putative protein
group_1959	hypothetical protein
group_196	hypothetical protein
group_1962	hypothetical protein
group_197	PE-PGRS family protein PE_PGRS61
group_198	hypothetical protein
group_1980	hypothetical protein
group_1986	Putative short-chain type dehydrogenase/reductase
group_1988	hypothetical protein
group_1992	Putative monooxygenase
group_1995	PPE family protein PPE26
group_1998	hypothetical protein
group_1999	hypothetical protein
group_2011	Ribonuclease VapC10
group_2012	hypothetical protein
group_2014	hypothetical protein
group_2017	hypothetical protein
group_2018	hypothetical protein
group_2019	putative protein
yfeW_1	hypothetical protein
group_2030	hypothetical protein
group_2035	hypothetical protein
group_2041	hypothetical protein
group_2045	23S rRNA-specific endonuclease VapC20
group_2054	putative oxidoreductase
group_2061	hypothetical protein
group_2062	hypothetical protein
group_2066	dITP/XTP pyrophosphatase
group_2075	Antitoxin
group_2084	Immunogenic protein MPT63
group_2086	hypothetical protein
group_2088	Putative monooxygenase
group_2093	hypothetical protein
group_2094	hypothetical protein
group_2095	putative protein
group_2097	tRNA-Pro(ggg)
group_2102	hypothetical protein
group_2105	Antitoxin
group_2110	putative protein
group_2116	hypothetical protein
group_2118	hypothetical protein
group_2119	hypothetical protein
group_2123	Serine protease inhibitor
group_2130	hypothetical protein
group_2131	hypothetical protein
group_2133	hypothetical protein
group_2139	putative protein
group_2141	Ribonuclease VapC47
group_2142	Phthiodiolone/phenolphthiodiolone dimycocerosates ketoreductase
group_2149	tRNA-Ala(tgc)
group_2155	(2E,6E)-farnesyl diphosphate synthase
group_2162	putative protein
group_2171	putative aminopeptidase
group_2173	putative protein
group_2176	hypothetical protein
group_2184	putative GTPase
group_2187	putative protein
group_2195	hypothetical protein
group_2199	hypothetical protein
group_2206	hypothetical protein
group_2208	hypothetical protein
group_2216	putative RNA pseudouridine synthase
group_2219	hypothetical protein
group_2221	Putative permease
group_2226	5S ribosomal RNA (partial)
group_2227	putative protein
group_2228	hypothetical protein
group_2238	hypothetical protein
group_2242	hypothetical protein
group_2252	hypothetical protein
group_2261	hypothetical protein
group_2266	putative protein
group_2267	Long-chain-fatty-acid--CoA ligase FadD17
group_2268	Putative S-adenosyl-L-methionine-dependent methyltransferase
group_2274	hypothetical protein
group_2278	hypothetical protein
group_2280	tRNA-Trp(cca)
group_2281	hypothetical protein
group_2285	hypothetical protein
group_2287	hypothetical protein
group_2288	hypothetical protein
group_2289	KsdD-like steroid dehydrogenase
group_2294	hypothetical protein
group_2296	hypothetical protein
group_2298	hypothetical protein
group_2306	putative protein
group_2312	hypothetical protein
group_2314	hypothetical protein
group_2320	hypothetical protein
group_2321	hypothetical protein
group_2328	hypothetical protein
group_2334	hypothetical protein
group_2337	tRNA-Pro(cgg)
group_2339	hypothetical protein
group_2340	hypothetical protein
group_2345	Antitoxin VapB28
group_2346	hypothetical protein
group_2347	putative protein
group_2349	putative protein
group_2354	hypothetical protein
group_2355	Secreted chorismate mutase
group_2360	hypothetical protein
group_2362	hypothetical protein
group_2364	hypothetical protein
group_2365	Long-chain-fatty-acid--CoA ligase FadD17
group_2370	hypothetical protein
group_2373	hypothetical protein
group_2381	hypothetical protein
group_2383	hypothetical protein
group_2395	hypothetical protein
group_2399	Putative cytochrome P450 135A1
group_2401	putative protein
group_2404	hypothetical protein
group_2411	hypothetical protein
group_2413	hypothetical protein
group_2420	hypothetical protein
group_2424	hypothetical protein
group_2429	hypothetical protein
group_2436	putative enoyl-CoA hydratase echA12
group_2437	hypothetical protein
group_2440	putative HTH-type transcriptional regulator
group_2441	hypothetical protein
group_2444	hypothetical protein
group_2451	hypothetical protein
group_2457	putative PPE family protein PPE42
group_2461	Ribonuclease VapC46
group_2473	hypothetical protein
group_2477	hypothetical protein
group_2480	hypothetical protein
group_2482	hypothetical protein
group_2491	putative HTH-type transcriptional regulator
group_2494	Putative ribonuclease VapC50
group_2496	hypothetical protein
group_2507	putative protein
group_2510	hypothetical protein
group_2511	putative protein
group_2515	Ribonuclease VapC43
group_2526	putative protein
group_2531	Ribonuclease VapC15
group_2532	hypothetical protein
group_2534	hypothetical protein
group_2535	tRNA-Lys(ttt)
group_2537	hypothetical protein
group_2544	hypothetical protein
group_2547	hypothetical protein
group_2549	Metal reductase
group_2552	hypothetical protein
group_2553	hypothetical protein
group_2555	hypothetical protein
group_2556	hypothetical protein
group_2559	hypothetical protein
group_2567	hypothetical protein
group_2571	hypothetical protein
group_2576	hypothetical protein
group_2577	hypothetical protein
group_2581	putative transcriptional regulatory protein
group_2584	hypothetical protein
group_2587	putative protein
group_2601	putative enoyl-CoA hydratase 1
group_2613	hypothetical protein
group_2615	putative protein
group_2628	hypothetical protein
group_2629	putative protein
group_263	Multidrug efflux system permease protein
group_2631	Putative monooxygenase
group_2635	hypothetical protein
group_2639	putative protein
group_2647	hypothetical protein
group_2650	HTH-type transcriptional regulator
group_2655	IS607 family transposase IS1537
group_2658	Ribonuclease VapC33
group_266	Putative O-methyltransferase
group_2662	hypothetical protein
group_2666	hypothetical protein
group_2667	hypothetical protein
group_2668	hypothetical protein
group_2671	hypothetical protein
group_2672	PE-PGRS family protein PE_PGRS11
group_2673	hypothetical protein
group_2676	hypothetical protein
group_2681	putative protein
group_2683	putative protein
group_2688	putative protein
group_2689	Fumarate reductase flavoprotein subunit
group_2691	PE-PGRS family protein PE25
group_2696	Putative O-phosphotransferase
group_2698	hypothetical protein
group_2699	ISNCY family transposase ISRjo3
group_2711	hypothetical protein
group_2715	Antitoxin VapB46
group_2727	hypothetical protein
group_2728	putative protein
group_2730	hypothetical protein
group_2731	hypothetical protein
group_2732	hypothetical protein
group_2736	Phosphatidylinositol mannoside acyltransferase
group_2737	hypothetical protein
group_2738	hypothetical protein
group_2742	hypothetical protein
group_2744	hypothetical protein
group_2745	PE family immunomodulator PE15
group_2755	hypothetical protein
group_2756	hypothetical protein
group_2758	putative protein
group_2761	hypothetical protein
group_2771	hypothetical protein
group_2772	putative ABC transporter permease
group_2775	tRNA-Thr(ggt)
group_2779	hypothetical protein
group_2781	hypothetical protein
group_2782	hypothetical protein
group_2784	hypothetical protein
group_2785	hypothetical protein
group_2789	Putative threonylcarbamoyl-AMP synthase
group_279	IS110 family transposase IS1547
group_2800	Putative oxidoreductase
group_2832	hypothetical protein
group_2838	hypothetical protein
group_2840	hypothetical protein
mutB_2	putative methylmalonyl-CoA mutase large subunit
group_2845	hypothetical protein
group_2848	hypothetical protein
group_2852	hypothetical protein
group_286	hypothetical protein
group_2862	Putative peptidoglycan hydrolase
group_2866	putative membrane protein
group_2867	putative protein
group_2870	hypothetical protein
group_2881	hypothetical protein
group_2892	hypothetical protein
group_2896	hypothetical protein
group_290	hypothetical protein
group_2902	hypothetical protein
group_2903	IS256 family transposase IS1553
group_2904	putative protein
group_2913	hypothetical protein
group_2918	Immunogenic protein MPT64
group_2919	hypothetical protein
group_2921	hypothetical protein
group_2924	hypothetical protein
group_2927	hypothetical protein
group_2932	hypothetical protein
group_2933	hypothetical protein
group_2934	hypothetical protein
group_2940	hypothetical protein
group_2947	hypothetical protein
group_2954	hypothetical protein
group_2957	putative 1,4-alpha-glucan branching enzyme
group_2963	putative protein
group_2964	Putative 3-methyladenine DNA glycosylase
group_2968	hypothetical protein
group_2971	Putative transport protein
group_2973	hypothetical protein
group_2986	Ribonuclease VapC19
group_2987	Toxin
group_2992	hypothetical protein
group_2997	putative PE-PGRS family protein PE_PGRS24
group_3000	hypothetical protein
group_3006	hypothetical protein
group_3009	hypothetical protein
group_3015	hypothetical protein
group_3018	hypothetical protein
group_3019	putative protein
group_3024	hypothetical protein
group_3026	hypothetical protein
group_3031	putative protein
group_3035	hypothetical protein
group_3040	hypothetical protein
group_3043	hypothetical protein
group_3044	IS256 family transposase ISRo1
group_3055	tRNA-Arg(ccg)
group_307	putative PPE family protein PPE37
group_3074	ISNCY family transposase ISRjo3
group_3075	hypothetical protein
group_3076	hypothetical protein
group_3099	hypothetical protein
group_3101	hypothetical protein
group_3102	hypothetical protein
group_3103	Putative S-adenosyl-L-methionine-dependent methyltransferase
group_3111	hypothetical protein
group_3116	hypothetical protein
group_3118	hypothetical protein
group_3124	Biotinylated protein TB7.3
group_3127	hypothetical protein
group_3129	hypothetical protein
group_3132	hypothetical protein
group_3134	Putative cystathionine beta-lyase
group_3137	hypothetical protein
group_3138	hypothetical protein
group_3144	hypothetical protein
group_3149	hypothetical protein
group_315	hypothetical protein
group_3150	hypothetical protein
group_3151	hypothetical protein
group_3152	hypothetical protein
group_3158	hypothetical protein
group_3167	putative PPE family protein PPE29
group_3173	Immunogenic protein MPT70
group_3176	putative CoA-transferase
group_3181	putative protein
group_3183	hypothetical protein
group_3203	hypothetical protein
group_3207	hypothetical protein
group_3210	hypothetical protein
group_322	hypothetical protein
group_3230	hypothetical protein
group_3235	hypothetical protein
group_3251	hypothetical protein
group_3258	hypothetical protein
group_3260	hypothetical protein
group_3278	putative protein
group_3280	Ribonuclease VapC26
group_3285	hypothetical protein
group_3287	hypothetical protein
group_3289	hypothetical protein
group_3292	hypothetical protein
group_3293	putative zinc-binding alcohol dehydrogenase
group_3295	Ribonuclease VapC17
group_3296	hypothetical protein
group_3299	hypothetical protein
group_3303	hypothetical protein
group_3310	hypothetical protein
group_3318	hypothetical protein
group_3325	hypothetical protein
group_3329	hypothetical protein
group_3334	Fluoroquinolones export permease protein
group_3339	hypothetical protein
group_3340	putative MFS-type transporter
group_3345	putative proteinA
group_3350	hypothetical protein
group_3352	hypothetical protein
group_3353	hypothetical protein
group_3354	hypothetical protein
group_3357	hypothetical protein
group_3362	hypothetical protein
group_3383	Putative decaprenylphosphoryl-5-phosphoribose phosphatase
group_3384	hypothetical protein
group_3386	hypothetical protein
group_3387	hypothetical protein
group_3390	Phenolphthiocerol synthesis polyketide synthase type I Pks15/1
group_3391	Antitoxin VapB35
group_3392	hypothetical protein
group_3394	hypothetical protein
group_340	Putative coenzyme F420-dependent oxidoreductase
group_3400	putative protein
group_3402	putative protein
group_3410	hypothetical protein
group_3411	hypothetical protein
group_3414	putative monooxygenase
group_3415	hypothetical protein
group_3431	hypothetical protein
group_3435	hypothetical protein
group_3436	dTDP-4-amino-4,6-dideoxyglucose formyltransferase
group_3437	putative protein
group_3438	hypothetical protein
group_3440	Putative S-adenosyl-L-methionine-dependent methyltransferase
group_3454	Antitoxin VapB15
group_3455	putative HTH-type transcriptional regulator
group_3456	hypothetical protein
group_3459	hypothetical protein
group_3461	hypothetical protein
group_3470	putative protein
group_3472	hypothetical protein
group_3475	hypothetical protein
group_3490	putative proteinA/RVBD_2386A
group_3509	hypothetical protein
group_3527	hypothetical protein
group_3533	hypothetical protein
group_3534	hypothetical protein
group_3535	hypothetical protein
group_3536	hypothetical protein
group_3544	hypothetical protein
group_3546	hypothetical protein
group_3554	hypothetical protein
group_3557	Putative S-adenosyl-L-methionine-dependent methyltransferase
group_3574	putative protein
group_3575	Putative S-adenosyl-L-methionine-dependent methyltransferase
group_3576	putative tRNA/rRNA methyltransferase
group_3581	Ribonuclease VapC42
group_3585	Phenolphthiocerol synthesis polyketide synthase type I Pks15/1
group_3587	L-gulono-1,4-lactone dehydrogenase
group_3589	IS607 family transposase IS1538
group_3602	hypothetical protein
group_3609	hypothetical protein
group_3610	hypothetical protein
group_3621	putative protein
group_3624	putative HTH-type transcriptional regulator
group_3625	hypothetical protein
group_3626	hypothetical protein
group_3627	IS256 family transposase IS1081
group_363	hypothetical protein
group_3631	IS256 family transposase IS1081
group_3632	hypothetical protein
group_3635	putative HTH-type transcriptional regulator
group_3638	putative protein
group_3640	hypothetical protein
group_3641	hypothetical protein
group_3644	hypothetical protein
group_3654	hypothetical protein
group_3656	putative protein
group_3663	hypothetical protein
group_3666	putative protein
group_3669	hypothetical protein
group_3673	hypothetical protein
group_3675	hypothetical protein
group_3677	hypothetical protein
group_3687	putative protein
group_369	hypothetical protein
group_3690	putative protein
group_3694	hypothetical protein
group_3695	hypothetical protein
group_3700	putative protein
group_3710	hypothetical protein
group_3711	Putative cytochrome P450 140
group_3714	Esterase PE16
group_3718	hypothetical protein
esxL_2	ESAT-6-like protein EsxL
group_3726	hypothetical protein
group_3731	hypothetical protein
group_3732	Putative cytochrome P450 123
group_3736	hypothetical protein
group_3758	Putative phosphoribosyl transferase
group_3762	hypothetical protein
group_3768	hypothetical protein
group_3775	Acyl-CoA dehydrogenase fadE12
group_3793	putative PPE family protein PPE17
group_3795	Neutral ceramidase
group_3800	hypothetical protein
group_3805	hypothetical protein
group_3807	Putative acyl-CoA dehydrogenase FadE17
group_3808	Fluoroquinolones export ATP-binding protein
group_3813	hypothetical protein
group_3820	Ribonuclease VapC27
group_3822	hypothetical protein
group_3823	putative oxidoreductase
group_3830	Toxin
group_3831	3,6-diketocamphane 1,6-monooxygenase
group_3835	hypothetical protein
group_3843	hypothetical protein
group_3844	putative protein
group_3849	hypothetical protein
group_3850	hypothetical protein
group_3855	putative protein
group_3856	putative protein
group_3859	hypothetical protein
group_3860	hypothetical protein
group_3865	hypothetical protein
group_3867	Multidrug efflux system ATP-binding protein
group_3868	hypothetical protein
group_3875	putative protein
group_388	putative protein
group_3880	hypothetical protein
group_3886	hypothetical protein
group_389	hypothetical protein
group_3893	hypothetical protein
group_3897	hypothetical protein
group_390	hypothetical protein
group_3900	hypothetical protein
group_3901	hypothetical protein
group_3902	hypothetical protein
group_3907	hypothetical protein
group_3909	hypothetical protein
group_391	hypothetical protein
group_3910	hypothetical protein
group_3913	putative protein
group_3919	Putative glyoxylase CFP32
group_3920	hypothetical protein
group_3921	Putative bifunctional exonuclease/endonuclease protein
group_3934	5'-3' exonuclease
group_3936	hypothetical protein
group_3939	hypothetical protein
group_3942	putative PE family protein PE23
group_3943	Putative S-adenosyl-L-methionine-dependent methyltransferase
group_3947	putative protein
group_3948	putative HTH-type transcriptional regulator
group_3959	IS110 family transposase ISArsp3
group_3971	hypothetical protein
group_3974	Elongation factor G-like protein
group_3980	putative protein
group_3983	hypothetical protein
group_3988	putative protein
group_3993	hypothetical protein
group_3994	putative protein
group_3995	hypothetical protein
group_3997	hypothetical protein
group_4001	hypothetical protein
group_4003	Corrinoid adenosyltransferase
group_4006	NADH dehydrogenase-like protein
group_4008	Alpha-pyrone synthesis polyketide synthase-like Pks11
group_4009	hypothetical protein
group_4010	putative protein
group_4011	hypothetical protein
group_4012	PPE family immunomodulator PPE68
group_4020	putative protein
group_4028	putative protein
group_4030	hypothetical protein
group_4033	hypothetical protein
group_4045	hypothetical protein
group_4053	hypothetical protein
group_4056	hypothetical protein
group_406	hypothetical protein
group_4062	CRISPR system single-strand-specific deoxyribonuclease Cas10/Csm1 (subtype III-A)
group_4068	putative protein
group_4070	IS5 family transposase ISMt1
group_4077	putative protein
group_4080	hypothetical protein
group_4087	Phenolphthiocerol synthesis polyketide synthase type I Pks15/1
group_409	hypothetical protein
group_4093	putative PPE family protein PPE33
group_4096	Long-chain-fatty-acid--AMP ligase FadD28
group_4103	hypothetical protein
group_4104	putative cation efflux system protein
group_4107	hypothetical protein
group_411	Long-chain-fatty-acid--AMP ligase FadD30
group_4110	hypothetical protein
group_4113	IS3 family transposase IS987
group_413	putative HTH-type transcriptional regulator
group_4132	IS3 family transposase IS987
group_4137	IS3 family transposase IS987
group_4161	Methylmalonyl-CoA carboxyltransferase 12S subunit
group_4166	putative transporter
group_4180	putative NTE family protein
group_419	hypothetical protein
group_4190	hypothetical protein
group_4196	Putative cytochrome P450 138
group_4201	putative GMC-type oxidoreductase
group_421	hypothetical protein
group_424	hypothetical protein
group_4242	putative protein
group_4248	hypothetical protein
group_4253	N-acetylmuramoyl-L-alanine amidase
group_4254	Alpha-(1->6)-mannopyranosyltransferase
group_4259	hypothetical protein
group_426	hypothetical protein
group_4262	hypothetical protein
group_4263	hypothetical protein
group_4265	hypothetical protein
group_427	hypothetical protein
group_4271	hypothetical protein
group_4276	Transcriptional regulator
group_4280	IS5 family transposase ISMt1
group_4283	hypothetical protein
group_4284	putative PPE family protein PPE20
group_4285	hypothetical protein
group_4286	hypothetical protein
group_4287	hypothetical protein
group_4289	hypothetical protein
group_4295	Putative cytochrome P450 136
group_4299	hypothetical protein
group_430	putative protein
group_4300	hypothetical protein
group_4302	hypothetical protein
group_4313	Universal stress protein
group_4314	hypothetical protein
group_4318	hypothetical protein
group_432	hypothetical protein
group_4321	hypothetical protein
group_4324	Flavin reductase
group_4326	hypothetical protein
group_4327	Chloramphenicol efflux pump
group_433	putative protein
group_4337	hypothetical protein
group_4338	hypothetical protein
group_4339	hypothetical protein
group_4340	putative PPE family protein PPE32
group_4347	hypothetical protein
group_4353	putative inactive lipase
group_4354	hypothetical protein
group_4356	hypothetical protein
group_4358	putative protein
group_4365	hypothetical protein
group_4368	putative protein
group_437	hypothetical protein
group_4374	hypothetical protein
group_4375	Putative diacyglycerol O-acyltransferase
group_4376	Universal stress protein
group_4379	putative protein
group_4380	hypothetical protein
group_4384	hypothetical protein
group_4389	hypothetical protein
group_439	Putative diacyglycerol O-acyltransferase
group_4392	hypothetical protein
group_4398	hypothetical protein
group_4399	hypothetical protein
group_440	hypothetical protein
group_4403	Multidrug efflux ATP-binding/permease protein
group_4404	hypothetical protein
group_441	Putative HTH-type transcriptional regulator
group_4411	putative oxidoreductase
group_4415	putative GMC-type oxidoreductase
group_4436	GTP cyclohydrolase 1 type 2
group_4442	Protein
esxK_1	ESAT-6-like protein EsxK
group_4453	putative FAD-linked oxidoreductase
group_4463	hypothetical protein
group_4469	hypothetical protein
group_4470	ISL3 family transposase IS1557
group_4471	ISL3 family transposase IS1557
group_4474	PPE family protein PPE18
group_4479	Putative diacyglycerol O-acyltransferase
group_4480	putative oxidoreductase
group_4481	hypothetical protein
group_4482	hypothetical protein
group_4483	hypothetical protein
group_4484	putative oxidoreductase
group_4485	hypothetical protein
group_4487	hypothetical protein
group_4488	putative transporter
group_4489	hypothetical protein
group_4490	hypothetical protein
group_4491	putative protein
group_4493	Ribonuclease VapC38
group_4496	hypothetical protein
group_4498	Putative enoyl-CoA hydratase EchA13
group_4499	putative protein
group_4505	putative protein
group_4508	Putative cytochrome P450 137
group_4511	Baeyer-Villiger monooxygenase
group_4512	hypothetical protein
group_4513	putative protein
group_4514	hypothetical protein
group_4515	putative protein
group_4516	IS21 family transposase ISAau2
group_4517	hypothetical protein
cysA1_1	Putative thiosulfate sulfurtransferase
group_4521	hypothetical protein
group_4522	hypothetical protein
group_4523	hypothetical protein
group_4524	hypothetical protein
group_4528	Heme uptake protein MmpL11
group_4529	Sarcosine/dimethylglycine N-methyltransferase
group_453	hypothetical protein
group_4531	Carotenoid cleavage oxygenase
group_4539	PPE family protein PPE57
group_4540	hypothetical protein
group_4541	hypothetical protein
group_4542	hypothetical protein
group_4543	putative protein
group_4544	hypothetical protein
group_4546	hypothetical protein
group_4547	Pyridoxal phosphate homeostasis protein
group_4549	hypothetical protein
group_4551	hypothetical protein
group_4552	hypothetical protein
group_4553	putative protein
group_4554	putative protein
group_4555	Ribonuclease VapC37
group_4557	hypothetical protein
group_4558	hypothetical protein
group_4559	hypothetical protein
group_456	hypothetical protein
group_4560	putative protein
group_4561	hypothetical protein
group_4562	hypothetical protein
group_4563	PE family protein PE13
group_4566	hypothetical protein
group_4567	hypothetical protein
group_4568	hypothetical protein
group_4570	PPE family protein PPE18
group_4571	putative PPE family protein PPE40
group_4573	hypothetical protein
group_4574	hypothetical protein
group_4576	hypothetical protein
group_4577	putative PPE family protein PPE51
group_4579	putative FAD-linked oxidoreductase
group_4581	hypothetical protein
group_4582	hypothetical protein
group_460	hypothetical protein
group_465	hypothetical protein
group_475	hypothetical protein
group_481	hypothetical protein
group_485	hypothetical protein
group_486	hypothetical protein
group_491	hypothetical protein
group_513	hypothetical protein
group_515	putative protein
group_522	hypothetical protein
group_531	hypothetical protein
group_535	hypothetical protein
group_548	hypothetical protein
group_549	hypothetical protein
group_550	hypothetical protein
mazE	hypothetical protein
group_563	hypothetical protein
group_580	ISNCY family transposase ISBli16
lipF	Carboxylesterase LipF
group_623	hypothetical protein
group_631	hypothetical protein
group_88	hypothetical protein
group_91	hypothetical protein
group_102	Long-chain-fatty-acid--CoA/3-oxocholest-4-en-26-oate--CoA ligase
group_152	hypothetical protein
group_18	hypothetical protein
group_225	hypothetical protein
group_230	Putative glyoxylase CFP32
group_312	hypothetical protein
esxL_1	ESAT-6-like protein EsxL
group_342	putative PPE family protein PPE51
group_371	hypothetical protein
sseC2_2	putative protein
group_4095	hypothetical protein
group_431	ISL3 family transposase IS1557
cysA1_2	Putative thiosulfate sulfurtransferase
group_587	hypothetical protein
group_717	hypothetical protein
group_720	hypothetical protein
group_729	hypothetical protein
group_732	hypothetical protein
group_750	hypothetical protein
group_757	hypothetical protein
group_79	putative PPE family protein PPE40
group_297	hypothetical protein
group_3917	IS110 family transposase IS1547
group_3918	IS110 family transposase IS1547
group_4133	IS3 family transposase IS987
group_4154	IS3 family transposase IS987
group_4223	IS3 family transposase IS987
group_4239	IS3 family transposase IS987
esxK_2	ESAT-6-like protein EsxK
group_490	hypothetical protein
sseC2_1	putative protein
group_735	hypothetical protein
group_100	Long-chain-fatty-acid--CoA/3-oxocholest-4-en-26-oate--CoA ligase
group_114	hypothetical protein
flp	Protein flp
group_273	putative protein
group_316	hypothetical protein
group_324	hypothetical protein
group_4118	IS3 family transposase IS987
group_4155	IS3 family transposase IS987
group_4211	IS3 family transposase IS987
group_4227	IS3 family transposase IS987
group_697	hypothetical protein
group_84	PE-PGRS family protein PE_PGRS18
group_4152	IS3 family transposase IS987
group_59	hypothetical protein
group_61	hypothetical protein
group_117	hypothetical protein
group_274	putative protein
group_4145	IS3 family transposase IS987
group_4159	IS3 family transposase IS987
group_4217	IS3 family transposase IS987
group_110	hypothetical protein
group_113	hypothetical protein
group_16	hypothetical protein
group_181	hypothetical protein
group_4237	IS3 family transposase IS987
group_566	Insertion element IS6110 uncharacterized 12.0 kDa protein
group_68	hypothetical protein
group_848	hypothetical protein
group_138	hypothetical protein
group_140	hypothetical protein
nnr_2	Bifunctional NAD(P)H-hydrate repair enzyme Nnr
group_188	hypothetical protein
group_231	Putative glyoxylase CFP32
group_26	hypothetical protein
group_374	hypothetical protein
esxP	ESAT-6-like protein EsxP
group_4058	putative protein
group_4114	IS3 family transposase IS987
group_4115	IS3 family transposase IS987
group_4130	IS3 family transposase IS987
group_4150	IS3 family transposase IS987
group_4158	IS3 family transposase IS987
group_4206	IS3 family transposase IS987
group_4218	IS3 family transposase IS987
group_4220	IS3 family transposase IS987
group_4226	IS3 family transposase IS987
group_423	hypothetical protein
group_4231	IS3 family transposase IS987
group_4233	IS3 family transposase IS987
group_664	hypothetical protein
group_718	Putative antitoxin VapB17
group_81	hypothetical protein
group_874	hypothetical protein
group_875	hypothetical protein
group_896	Putative lipoprotein LppA
group_90	hypothetical protein
group_112	hypothetical protein
group_131	hypothetical protein
group_135	putative cation-transporting ATPase F
group_148	FAD-containing monooxygenase EthA
group_158	hypothetical protein
group_177	hypothetical protein
espK_2	ESX-1 secretion-associated protein EspK
PPE2_1	putative PPE family protein PPE2
group_22	hypothetical protein
group_224	hypothetical protein
group_24	hypothetical protein
group_241	Sphingomyelinase
group_249	Serine/threonine-protein kinase PknD
group_251	hypothetical protein
group_262	hypothetical protein
group_268	hypothetical protein
mrp_1	Iron-sulfur cluster carrier protein
group_289	6-hydroxy-D-nicotine oxidase
group_291	hypothetical protein
group_295	hypothetical protein
murF_2	UDP-N-acetylmuramoyl-tripeptide--D-alanyl-D-alanine ligase
group_318	hypothetical protein
group_33	PPE family protein PPE34
ppsA_2	Phthiocerol synthesis polyketide synthase type I PpsA
group_34	PPE family protein PPE34
group_341	hypothetical protein
group_347	Putative diacyglycerol O-acyltransferase
icd_2	Isocitrate dehydrogenase [NADP]
metY_2	O-acetyl-L-homoserine sulfhydrylase
metXA_2	Homoserine O-acetyltransferase
ilvX_2	Putative acetolactate synthase large subunit IlvX
group_368	hypothetical protein
sodB_2	Superoxide dismutase [Fe]
ppsC_2	Phthiocerol synthesis polyketide synthase type I PpsC
group_3836	putative protein
group_40	hypothetical protein
group_4051	hypothetical protein
group_4069	hypothetical protein
group_4121	IS3 family transposase IS987
group_4138	IS3 family transposase IS987
group_4141	IS3 family transposase IS987
group_4143	IS3 family transposase IS987
group_4147	IS3 family transposase IS987
group_4148	IS3 family transposase IS987
group_4149	IS3 family transposase IS987
group_4153	IS3 family transposase IS987
group_4204	IS3 family transposase IS987
group_4213	IS3 family transposase IS987
group_4214	IS3 family transposase IS987
group_4230	IS3 family transposase IS987
group_4232	IS3 family transposase IS987
group_4235	IS3 family transposase IS987
group_4241	IS3 family transposase IS987
group_43	hypothetical protein
esxV_2	ESAT-6-like protein EsxV
group_65	hypothetical protein
group_655	hypothetical protein
group_663	hypothetical protein
group_67	hypothetical protein
group_686	hypothetical protein
group_73	hypothetical protein
group_74	hypothetical protein
group_75	hypothetical protein
group_804	hypothetical protein
mrp_2	Iron-sulfur cluster carrier protein
group_830	hypothetical protein
group_841	hypothetical protein
group_858	hypothetical protein
group_872	hypothetical protein
group_873	hypothetical protein
group_885	hypothetical protein
group_888	hypothetical protein
group_89	Triacylglycerol lipase
group_898	hypothetical protein
group_916	hypothetical protein
group_96	hypothetical protein
group_968	hypothetical protein
group_969	hypothetical protein
esxN_2	ESAT-6-like protein EsxN
group_971	Putative antitoxin VapB17
group_972	Putative lipoprotein LppA

## Sheet: Table S6
Supplemental Table S6 The gene sets identified from the Venn diagram (Figure 3A) (Illumina assemblies excluding hypothetical proteins and putative proteins).
Genes identified from Illumina assemblies (n=264)	Annotation
(Hypothetical proteins and putative proteins were excluded.)
group_2593	(2E,6E)-farnesyl diphosphate synthase
group_4430	(2Z,6E)-farnesyl diphosphate synthase
group_3172	23S rRNA-specific endonuclease VapC20
group_3879	2-haloacrylate reductase
group_4427	2-haloacrylate reductase
group_3542	2-methylcitrate dehydratase
group_1114	2-succinylbenzoate--CoA ligase
group_2525	34 kDa antigenic protein
group_2530	35 kDa protein
group_3423	4-hydroxy-2-oxovalerate aldolase
group_3969	4-hydroxyphenylalkanoate adenylyltransferase
group_361	5'-3' exonuclease
group_303	5-formyltetrahydrofolate cyclo-ligase
group_1595	5S ribosomal RNA (partial)
group_1164	6-hydroxy-D-nicotine oxidase
group_4245	6-phosphogluconate dehydrogenase, NAD(+)-dependent, decarboxylating
aes_4	Acetyl esterase
group_3970	Acyl-CoA dehydrogenase fadE12
group_3485	Acyl-CoA dehydrogenase FadE29
group_163	Acyl-CoA dehydrogenase FadE34
group_2570	Acyl-CoA dehydrogenase FadE34
group_3799	Alpha-(1->6)-mannopyranosyltransferase
group_3154	Antitoxin VapB11
group_1439	Antitoxin VapB15
group_2799	Antitoxin VapB21
group_1629	Antitoxin VapB22
group_2204	Antitoxin VapB27
group_1671	Antitoxin VapB28
group_3193	Antitoxin VapB30
group_3540	Antitoxin VapB40
group_3363	Antitoxin VapB41
group_4451	Antitoxin VapB47
group_2025	AP-4-A phosphorylase
group_903	Baeyer-Villiger monooxygenase
group_1260	Carotenoid cleavage oxygenase
group_3872	Carotenoid cleavage oxygenase
group_2188	Catechol O-methyltransferase
group_3705	Corrinoid adenosyltransferase
group_4344	CRISPR system single-strand-specific deoxyribonuclease Cas10/Csm1 (subtype III-A)
group_164	Crotonobetainyl-CoA reductase
group_334	Cytochrome P450 144
dap_4	D-aminopeptidase
group_202	D-aminopeptidase
group_203	D-aminopeptidase
group_1662	Decaprenyl-phosphate phosphoribosyltransferase
fbpA_1	Diacylglycerol acyltransferase/mycolyltransferase Ag85A
group_2163	Diterpene synthase
group_1308	dITP/XTP pyrophosphatase
group_2262	Dodecin
group_2915	dTDP-4-amino-4,6-dideoxyglucose formyltransferase
group_4049	Elongation factor G-like protein
esxK	ESAT-6-like protein EsxK
esxL	ESAT-6-like protein EsxL
group_1385	F420H(2)-dependent quinone reductase
group_3195	Fluoroquinolones export permease protein
group_2069	Fumarate reductase flavoprotein subunit
group_1933	GDSL-like esterase
group_4251	GTP cyclohydrolase 1 type 2
group_3198	Heme-binding protein
group_1020	Hydroxyacylglutathione hydrolase
group_2342	Immunogenic protein MPT63
group_2196	Immunogenic protein MPT64
group_2652	Immunogenic protein MPT64
group_509	IS110 family transposase ISArsp3
group_183	IS21 family transposase ISMt2
group_4360	IS607 family transposase IS1535
group_4183	IS607 family transposase IS1538
group_2304	ISNCY family transposase ISBli16
group_3444	ISNCY family transposase ISMav10
group_3022	ISNCY family transposase ISRjo3
group_3208	ISNCY family transposase ISRjo3
group_1273	KsdD-like steroid dehydrogenase
group_240	Long-chain-fatty-acid--AMP ligase FadD30
group_4322	Long-chain-fatty-acid--AMP ligase FadD32
group_3788	Long-chain-fatty-acid--CoA ligase FadD13
group_3229	Long-chain-fatty-acid--CoA ligase FadD17
group_518	Long-chain-fatty-acid--CoA/3-oxocholest-4-en-26-oate--CoA ligase
group_2590	Low molecular weight antigen MTB12
group_1835	Magnesium transporter MgtE
group_1948	Metal reductase
group_4424	Methylmalonyl-CoA carboxyltransferase 12S subunit
group_2001	Monoacylglycerol lipase
group_4294	Multidrug efflux ATP-binding/permease protein
group_585	Multidrug efflux system permease protein
group_4397	NADH dehydrogenase-like protein
group_3878	Neutral ceramidase
PE5	PE family immunomodulator PE5
group_1518	PE family protein PE13
group_1821	PE family protein PE13
group_4455	PE family protein PE13
group_2513	PE-PGRS family protein PE_PGRS11
group_1002	PE-PGRS family protein PE_PGRS26
group_3368	PE-PGRS family protein PE25
prfA_1	Peptide chain release factor 1
group_159	Phenolphthiocerol synthesis polyketide synthase type I Pks15/1
group_1648	Phenolphthiocerol synthesis polyketide synthase type I Pks15/1
group_2850	Phosphatase
group_1064	Phthiodiolone/phenolphthiodiolone dimycocerosates ketoreductase
group_3228	Phthiotriol/phenolphthiotriol dimycocerosates methyltransferase
group_325	Polyketide synthase-like Pks10
group_3122	Polyprenol-phosphate-mannose-dependent alpha-(1-2)-phosphatidylinositol mannoside mannosyltransferase
group_2979	PPE family protein PPE15
group_3812	PPE family protein PPE15
group_1367	PPE family protein PPE41
group_451	PPE family protein PPE57
cobM_1	Precorrin-4 C(11)-methyltransferase
group_3341	Protein
group_625	Protein
group_1140	Putative 3-methyladenine DNA glycosylase
group_1295	putative ABC transporter ATP-binding protein
group_3519	putative ABC transporter ATP-binding protein
group_2390	putative ABC transporter permease
group_993	putative ABC transporter permease
group_2969	Putative acyl-CoA dehydrogenase FadE17
group_4329	Putative acyl-CoA dehydrogenase FadE17
group_1586	putative acyl-CoA dehydrogenase fadE25
group_4176	Putative aminoglycoside phosphotransferase
group_1509	Putative antitoxin VapB10
group_1280	Putative antitoxin VapB12
group_1636	Putative antitoxin VapB19
group_3501	Putative ATPase
group_4406	putative cation efflux system protein
group_2945	putative CoA-transferase
group_2189	Putative CoA-transferase subunit beta
group_1780	Putative conjugal transfer protein
group_385	Putative cystathionine beta-lyase
group_4017	Putative cytochrome P450 123
group_2642	Putative cytochrome P450 126
group_3914	Putative cytochrome P450 132
group_2398	Putative cytochrome P450 135A1
group_4445	Putative cytochrome P450 135B1
group_4041	Putative cytochrome P450 136
group_4290	Putative cytochrome P450 138
group_3741	Putative cytochrome P450 140
group_3541	Putative decaprenylphosphoryl-5-phosphoribose phosphatase
group_1027	Putative diacyglycerol O-acyltransferase
group_2351	Putative dioxygenase
group_1719	Putative DNA-binding proteinA
group_1191	putative enoyl-CoA hydratase echA12
group_3059	putative enoyl-CoA hydratase echA12
group_3956	putative FAD-linked oxidoreductase
group_4335	putative FAD-linked oxidoreductase
group_4473	putative FAD-linked oxidoreductase
group_3941	putative fatty acyl-CoA transferase
group_1588	Putative fatty-acid--CoA ligase fadD25
group_1615	Putative fatty-acid--CoA ligase fadD25
group_3317	putative glycosyl hydrolase
group_349	putative glycosyl hydrolase
group_1213	putative glycosyltransferase
group_3275	putative glycosyltransferase
group_3999	Putative glyoxylase CFP32
group_4402	putative GMC-type oxidoreductase
group_2049	putative GTPase
group_1373	putative HTH-type transcriptional regulator
group_1700	putative HTH-type transcriptional regulator
group_1845	putative HTH-type transcriptional regulator
group_2137	putative HTH-type transcriptional regulator
group_2251	putative HTH-type transcriptional regulator
group_2431	putative HTH-type transcriptional regulator
group_2433	putative HTH-type transcriptional regulator
group_2600	putative HTH-type transcriptional regulator
group_3047	putative HTH-type transcriptional regulator
group_3206	putative HTH-type transcriptional regulator
group_3323	putative HTH-type transcriptional regulator
group_3776	putative HTH-type transcriptional regulator
group_382	putative HTH-type transcriptional regulator
group_3898	putative HTH-type transcriptional regulator
group_4079	Putative HTH-type transcriptional regulator
group_4277	putative HTH-type transcriptional regulator
pks1_1	Putative inactive phenolphthiocerol synthesis polyketide synthase type I Pks1
group_2446	Putative ligase
group_1159	putative membrane protein
group_1211	putative membrane protein
group_2677	putative membrane protein
group_2926	putative membrane protein
group_3326	putative membrane protein
group_4014	putative membrane protein
group_4282	putative membrane protein
group_454	putative membrane protein
mutB	putative methylmalonyl-CoA mutase large subunit
group_2665	Putative methyltransferase
group_1982	putative MFS-type transporter
group_1938	Putative monooxygenase
group_3605	putative monooxygenase
group_3998	putative multidrug-efflux transporter
group_4071	putative NTE family protein
group_2550	putative oxidoreductase
group_2809	putative oxidoreductase
group_3199	putative oxidoreductase
group_3496	putative oxidoreductase
group_4177	putative oxidoreductase
group_1918	Putative peptidoglycan hydrolase
group_1333	putative polyglutamine synthesis accessory protein
group_4005	putative PPE family protein PPE17
group_244	putative PPE family protein PPE20
group_3597	putative PPE family protein PPE36
group_688	putative PPE family protein PPE38
group_1251	putative PPE family protein PPE40
group_2435	putative PPE family protein PPE40
group_4475	putative PPE family protein PPE40
group_436	putative PPE family protein PPE40
group_3374	putative PPE family protein PPE42
group_3471	putative PPE family protein PPE42
group_3839	putative PPE family protein PPE51
group_643	putative PPE family protein PPE51
group_1920	Putative prophage phiRv2 integrase
group_761	Putative pterin-4-alpha-carbinolamine dehydratase
group_2703	Putative quercetin 2,3-dioxygenase
group_2181	putative response regulatory protein
group_1124	Putative S-adenosyl-L-methionine-dependent methyltransferase
group_1585	Putative S-adenosyl-L-methionine-dependent methyltransferase
group_1812	Putative S-adenosyl-L-methionine-dependent methyltransferase
group_2356	Putative S-adenosyl-L-methionine-dependent methyltransferase
group_2821	Putative S-adenosyl-L-methionine-dependent methyltransferase
group_3912	Putative S-adenosyl-L-methionine-dependent methyltransferase
group_4184	Putative S-adenosyl-L-methionine-dependent methyltransferase
group_645	Putative S-adenosyl-L-methionine-dependent methyltransferase
group_4169	Putative serine esterase
group_2063	Putative succinyl-CoA transferase
group_3171	putative SufE-like protein
group_3703	putative sulfate transporter
group_4382	putative SURF1-like protein
group_1074	Putative uncharacterized protein
group_1175	putative zinc-binding alcohol dehydrogenase
group_4078	Pyridoxal phosphate homeostasis protein
rnpA	Ribonuclease P protein component
group_1296	Ribonuclease VapC13
group_1400	Ribonuclease VapC21
group_3359	Ribonuclease VapC26
group_4383	Ribonuclease VapC27
group_2694	Ribonuclease VapC30
group_2099	Ribonuclease VapC31
group_2034	Ribonuclease VapC32
group_1626	Ribonuclease VapC35
group_4443	Ribonuclease VapC37
group_1944	Ribonuclease VapC42
group_1931	Ribonuclease VapC43
group_1815	Ribonuclease VapC44
group_2864	Ribonuclease VapC47
group_2795	Ribonuclease VapC48
group_3337	Ribonuclease VapC49
group_3276	Ribonuclease VapC51
group_3604	S-(hydroxymethyl)mycothiol dehydrogenase
group_4303	Sarcosine/dimethylglycine N-methyltransferase
group_1437	Secreted chorismate mutase
group_3307	Sensor histidine kinase component HK1
group_3945	Steroid C26-monooxygenase
group_3165	Thioredoxin-like reductase
group_3069	Toxin
group_2884	Transcriptional regulator
group_4393	Transcriptional regulator
group_2701	tRNA-Arg(ccg)
group_1665	tRNA-Asn(gtt)
group_2250	tRNA-Gly(gcc)
group_2941	tRNA-Gly(gcc)
group_1557	tRNA-Leu(taa)
group_1104	tRNA-Pro(cgg)
group_1271	tRNA-Pro(ggg)
group_3010	tRNA-Pro(tgg)
group_3252	tRNA-Thr(ggt)
group_3283	tRNA-Val(cac)
group_3311	tRNA-Val(gac)
group_1247	Universal stress protein
group_403	Universal stress protein

## Sheet: Table S7
Supplemental Table S7 The gene sets identified from the Venn diagram (Figure 3A) (hybrid Illumina and ONT assemblies excluding hypothetical proteins and putative proteins).
Genes identified from hybrid Illumina and ONT assemblies (n=352)	Annotation
(Hypothetical proteins and putative proteins were excluded.)
group_2155	(2E,6E)-farnesyl diphosphate synthase
group_2045	23S rRNA-specific endonuclease VapC20
group_1391	2-methylcitrate dehydratase
group_3831	3,6-diketocamphane 1,6-monooxygenase
group_1825	34 kDa antigenic protein
group_1350	3'-5' exoribonuclease
group_3934	5'-3' exonuclease
group_2226	5S ribosomal RNA (partial)
group_289	6-hydroxy-D-nicotine oxidase
group_3775	Acyl-CoA dehydrogenase fadE12
group_1129	Acyl-CoA dehydrogenase FadE29
group_4254	Alpha-(1->6)-mannopyranosyltransferase
group_4008	Alpha-pyrone synthesis polyketide synthase-like Pks11
group_1483	Alpha-pyrone synthesis polyketide synthase-like Pks18
group_2075	Antitoxin
group_2105	Antitoxin
group_3454	Antitoxin VapB15
group_1464	Antitoxin VapB26
group_1078	Antitoxin VapB27
group_2345	Antitoxin VapB28
group_1667	Antitoxin VapB31
group_3391	Antitoxin VapB35
group_1121	Antitoxin VapB41
group_2715	Antitoxin VapB46
group_4511	Baeyer-Villiger monooxygenase
nnr_2	Bifunctional NAD(P)H-hydrate repair enzyme Nnr
group_1644	Bifunctional protein
group_3124	Biotinylated protein TB7.3
lipF	Carboxylesterase LipF
group_4531	Carotenoid cleavage oxygenase
group_4327	Chloramphenicol efflux pump
group_1750	Chorismate pyruvate-lyase
group_4003	Corrinoid adenosyltransferase
group_4062	CRISPR system single-strand-specific deoxyribonuclease Cas10/Csm1 (subtype III-A)
group_1404	Cytochrome P450 130
group_1346	D,L-glycerol 3-phosphate phosphatase
group_1807	Decaprenyl-phosphate phosphoribosyltransferase
group_2066	dITP/XTP pyrophosphatase
group_3436	dTDP-4-amino-4,6-dideoxyglucose formyltransferase
group_3974	Elongation factor G-like protein
esxK_1	ESAT-6-like protein EsxK
esxK_2	ESAT-6-like protein EsxK
esxL_2	ESAT-6-like protein EsxL
esxL_1	ESAT-6-like protein EsxL
esxN_2	ESAT-6-like protein EsxN
esxP	ESAT-6-like protein EsxP
esxV_2	ESAT-6-like protein EsxV
group_3714	Esterase PE16
espK_2	ESX-1 secretion-associated protein EspK
group_148	FAD-containing monooxygenase EthA
group_4324	Flavin reductase
group_3808	Fluoroquinolones export ATP-binding protein
group_3334	Fluoroquinolones export permease protein
group_2689	Fumarate reductase flavoprotein subunit
group_4436	GTP cyclohydrolase 1 type 2
group_4528	Heme uptake protein MmpL11
metXA_2	Homoserine O-acetyltransferase
group_1281	HTH-type transcriptional regulator
group_2650	HTH-type transcriptional regulator
group_1684	HTH-type transcriptional repressor
group_1109	Immunity factor for TNT
group_2084	Immunogenic protein MPT63
group_1418	Immunogenic protein MPT64
group_2918	Immunogenic protein MPT64
group_3173	Immunogenic protein MPT70
group_566	Insertion element IS6110 uncharacterized 12.0 kDa protein
group_1809	Intracellular chorismate mutase
mrp_1	Iron-sulfur cluster carrier protein
mrp_2	Iron-sulfur cluster carrier protein
group_279	IS110 family transposase IS1547
group_3917	IS110 family transposase IS1547
group_3918	IS110 family transposase IS1547
group_3959	IS110 family transposase ISArsp3
group_4516	IS21 family transposase ISAau2
group_3627	IS256 family transposase IS1081
group_3631	IS256 family transposase IS1081
group_2903	IS256 family transposase IS1553
group_3044	IS256 family transposase ISRo1
group_4113	IS3 family transposase IS987
group_4132	IS3 family transposase IS987
group_4137	IS3 family transposase IS987
group_4133	IS3 family transposase IS987
group_4154	IS3 family transposase IS987
group_4223	IS3 family transposase IS987
group_4239	IS3 family transposase IS987
group_4118	IS3 family transposase IS987
group_4155	IS3 family transposase IS987
group_4211	IS3 family transposase IS987
group_4227	IS3 family transposase IS987
group_4152	IS3 family transposase IS987
group_4145	IS3 family transposase IS987
group_4159	IS3 family transposase IS987
group_4217	IS3 family transposase IS987
group_4237	IS3 family transposase IS987
group_4114	IS3 family transposase IS987
group_4115	IS3 family transposase IS987
group_4130	IS3 family transposase IS987
group_4150	IS3 family transposase IS987
group_4158	IS3 family transposase IS987
group_4206	IS3 family transposase IS987
group_4218	IS3 family transposase IS987
group_4220	IS3 family transposase IS987
group_4226	IS3 family transposase IS987
group_4231	IS3 family transposase IS987
group_4233	IS3 family transposase IS987
group_4121	IS3 family transposase IS987
group_4138	IS3 family transposase IS987
group_4141	IS3 family transposase IS987
group_4143	IS3 family transposase IS987
group_4147	IS3 family transposase IS987
group_4148	IS3 family transposase IS987
group_4149	IS3 family transposase IS987
group_4153	IS3 family transposase IS987
group_4204	IS3 family transposase IS987
group_4213	IS3 family transposase IS987
group_4214	IS3 family transposase IS987
group_4230	IS3 family transposase IS987
group_4232	IS3 family transposase IS987
group_4235	IS3 family transposase IS987
group_4241	IS3 family transposase IS987
group_1220	IS481 family transposase ISChy3
group_4070	IS5 family transposase ISMt1
group_4280	IS5 family transposase ISMt1
group_2655	IS607 family transposase IS1537
group_3589	IS607 family transposase IS1538
group_4470	ISL3 family transposase IS1557
group_4471	ISL3 family transposase IS1557
group_431	ISL3 family transposase IS1557
group_1820	ISNCY family transposase ISBli16
group_580	ISNCY family transposase ISBli16
group_2699	ISNCY family transposase ISRjo3
group_3074	ISNCY family transposase ISRjo3
icd_2	Isocitrate dehydrogenase [NADP]
group_2289	KsdD-like steroid dehydrogenase
group_3587	L-gulono-1,4-lactone dehydrogenase
group_4096	Long-chain-fatty-acid--AMP ligase FadD28
group_411	Long-chain-fatty-acid--AMP ligase FadD30
group_2267	Long-chain-fatty-acid--CoA ligase FadD17
group_2365	Long-chain-fatty-acid--CoA ligase FadD17
group_102	Long-chain-fatty-acid--CoA/3-oxocholest-4-en-26-oate--CoA ligase
group_100	Long-chain-fatty-acid--CoA/3-oxocholest-4-en-26-oate--CoA ligase
group_2549	Metal reductase
group_4161	Methylmalonyl-CoA carboxyltransferase 12S subunit
group_4403	Multidrug efflux ATP-binding/permease protein
group_3867	Multidrug efflux system ATP-binding protein
group_263	Multidrug efflux system permease protein
group_4253	N-acetylmuramoyl-L-alanine amidase
group_4006	NADH dehydrogenase-like protein
group_3795	Neutral ceramidase
group_1731	Nucleoid-associated protein
metY_2	O-acetyl-L-homoserine sulfhydrylase
group_2745	PE family immunomodulator PE15
PE5_1	PE family immunomodulator PE5
group_4563	PE family protein PE13
group_2672	PE-PGRS family protein PE_PGRS11
group_84	PE-PGRS family protein PE_PGRS18
group_197	PE-PGRS family protein PE_PGRS61
group_2691	PE-PGRS family protein PE25
group_3390	Phenolphthiocerol synthesis polyketide synthase type I Pks15/1
group_3585	Phenolphthiocerol synthesis polyketide synthase type I Pks15/1
group_4087	Phenolphthiocerol synthesis polyketide synthase type I Pks15/1
group_2736	Phosphatidylinositol mannoside acyltransferase
group_1707	pH-sensitive adenylate cyclase
ppsA_2	Phthiocerol synthesis polyketide synthase type I PpsA
ppsC_2	Phthiocerol synthesis polyketide synthase type I PpsC
group_2142	Phthiodiolone/phenolphthiodiolone dimycocerosates ketoreductase
group_4012	PPE family immunomodulator PPE68
group_4474	PPE family protein PPE18
group_4570	PPE family protein PPE18
group_1995	PPE family protein PPE26
group_133	PPE family protein PPE34
group_33	PPE family protein PPE34
group_34	PPE family protein PPE34
group_4539	PPE family protein PPE57
group_1770	Protein
group_4442	Protein
flp	Protein flp
group_2957	putative 1,4-alpha-glucan branching enzyme
group_2964	Putative 3-methyladenine DNA glycosylase
group_1315	putative ABC transporter ATP-binding protein
group_1502	putative ABC transporter ATP-binding protein
group_2772	putative ABC transporter permease
ilvX_2	Putative acetolactate synthase large subunit IlvX
group_1508	putative acyl-CoA dehydrogenase FadE10
group_3807	Putative acyl-CoA dehydrogenase FadE17
group_2171	putative aminopeptidase
group_1422	Putative antitoxin VapB10
group_718	Putative antitoxin VapB17
group_971	Putative antitoxin VapB17
group_1450	Putative antitoxin VapB45
group_3921	Putative bifunctional exonuclease/endonuclease protein
group_4104	putative cation efflux system protein
group_135	putative cation-transporting ATPase F
group_3176	putative CoA-transferase
group_1113	Putative coenzyme F420-dependent oxidoreductase
group_340	Putative coenzyme F420-dependent oxidoreductase
group_3134	Putative cystathionine beta-lyase
group_3732	Putative cytochrome P450 123
group_2399	Putative cytochrome P450 135A1
group_4295	Putative cytochrome P450 136
group_4508	Putative cytochrome P450 137
group_4196	Putative cytochrome P450 138
group_3711	Putative cytochrome P450 140
group_1946	Putative cytochrome P450 141
group_3383	Putative decaprenylphosphoryl-5-phosphoribose phosphatase
group_1544	Putative diacyglycerol O-acyltransferase
group_4375	Putative diacyglycerol O-acyltransferase
group_439	Putative diacyglycerol O-acyltransferase
group_4479	Putative diacyglycerol O-acyltransferase
group_347	Putative diacyglycerol O-acyltransferase
group_2601	putative enoyl-CoA hydratase 1
group_1357	putative enoyl-CoA hydratase echA12
group_2436	putative enoyl-CoA hydratase echA12
group_1249	Putative enoyl-CoA hydratase EchA13
group_1796	Putative enoyl-CoA hydratase EchA13
group_4498	Putative enoyl-CoA hydratase EchA13
group_4453	putative FAD-linked oxidoreductase
group_4579	putative FAD-linked oxidoreductase
group_1890	Putative fatty-acid--CoA ligase FadD10
group_1690	Putative gluconeogenesis factor
group_1063	putative glycosyltransferase
group_1525	putative glycosyltransferase
group_3919	Putative glyoxylase CFP32
group_230	Putative glyoxylase CFP32
group_231	Putative glyoxylase CFP32
group_4201	putative GMC-type oxidoreductase
group_4415	putative GMC-type oxidoreductase
group_2184	putative GTPase
group_1180	putative HTH-type transcriptional regulator
group_1192	putative HTH-type transcriptional regulator
group_2440	putative HTH-type transcriptional regulator
group_2491	putative HTH-type transcriptional regulator
group_3455	putative HTH-type transcriptional regulator
group_3624	putative HTH-type transcriptional regulator
group_3635	putative HTH-type transcriptional regulator
group_3948	putative HTH-type transcriptional regulator
group_413	putative HTH-type transcriptional regulator
group_441	Putative HTH-type transcriptional regulator
group_4353	putative inactive lipase
pks1	Putative inactive phenolphthiocerol synthesis polyketide synthase type I Pks1
group_896	Putative lipoprotein LppA
group_972	Putative lipoprotein LppA
group_2866	putative membrane protein
group_1162	putative metallo-hydrolase
mutB_2	putative methylmalonyl-CoA mutase large subunit
group_1675	putative MFS-type transporter
group_3340	putative MFS-type transporter
group_1992	Putative monooxygenase
group_2088	Putative monooxygenase
group_2631	Putative monooxygenase
group_3414	putative monooxygenase
group_1411	putative Na(+)/H(+) exchanger
group_1486	putative N-acetyltransferase
group_4180	putative NTE family protein
group_266	Putative O-methyltransferase
group_2696	Putative O-phosphotransferase
group_1714	putative oxidoreductase
group_2054	putative oxidoreductase
group_2800	Putative oxidoreductase
group_3823	putative oxidoreductase
group_4411	putative oxidoreductase
group_4480	putative oxidoreductase
group_4484	putative oxidoreductase
group_3942	putative PE family protein PE23
group_2997	putative PE-PGRS family protein PE_PGRS24
group_2862	Putative peptidoglycan hydrolase
group_2221	Putative permease
group_3758	Putative phosphoribosyl transferase
group_3793	putative PPE family protein PPE17
PPE2_1	putative PPE family protein PPE2
group_178	putative PPE family protein PPE20
group_4284	putative PPE family protein PPE20
group_3167	putative PPE family protein PPE29
group_4340	putative PPE family protein PPE32
group_4093	putative PPE family protein PPE33
group_1677	putative PPE family protein PPE36
group_307	putative PPE family protein PPE37
group_4571	putative PPE family protein PPE40
group_79	putative PPE family protein PPE40
group_2457	putative PPE family protein PPE42
group_4577	putative PPE family protein PPE51
group_342	putative PPE family protein PPE51
group_3490	putative proteinA/RVBD_2386A
group_1221	Putative pterin-4-alpha-carbinolamine dehydratase
group_2494	Putative ribonuclease VapC50
group_2216	putative RNA pseudouridine synthase
group_2268	Putative S-adenosyl-L-methionine-dependent methyltransferase
group_3103	Putative S-adenosyl-L-methionine-dependent methyltransferase
group_3440	Putative S-adenosyl-L-methionine-dependent methyltransferase
group_3557	Putative S-adenosyl-L-methionine-dependent methyltransferase
group_3575	Putative S-adenosyl-L-methionine-dependent methyltransferase
group_3943	Putative S-adenosyl-L-methionine-dependent methyltransferase
group_1952	Putative secreted protein.1
group_1986	Putative short-chain type dehydrogenase/reductase
cysA1_1	Putative thiosulfate sulfurtransferase
cysA1_2	Putative thiosulfate sulfurtransferase
group_2789	Putative threonylcarbamoyl-AMP synthase
group_2581	putative transcriptional regulatory protein
group_2971	Putative transport protein
group_4166	putative transporter
group_4488	putative transporter
group_3576	putative tRNA/rRNA methyltransferase
group_1340	Putative uncharacterized protein
group_3293	putative zinc-binding alcohol dehydrogenase
group_4547	Pyridoxal phosphate homeostasis protein
group_2011	Ribonuclease VapC10
group_2531	Ribonuclease VapC15
group_3295	Ribonuclease VapC17
group_2986	Ribonuclease VapC19
group_1218	Ribonuclease VapC21
group_3280	Ribonuclease VapC26
group_3820	Ribonuclease VapC27
group_1073	Ribonuclease VapC29
group_1484	Ribonuclease VapC30
group_1455	Ribonuclease VapC32
group_2658	Ribonuclease VapC33
group_4555	Ribonuclease VapC37
group_4493	Ribonuclease VapC38
group_1320	Ribonuclease VapC39
group_3581	Ribonuclease VapC42
group_2515	Ribonuclease VapC43
group_2461	Ribonuclease VapC46
group_2141	Ribonuclease VapC47
group_1637	S-(hydroxymethyl)mycothiol dehydrogenase
group_4529	Sarcosine/dimethylglycine N-methyltransferase
group_2355	Secreted chorismate mutase
group_2123	Serine protease inhibitor
group_249	Serine/threonine-protein kinase PknD
group_241	Sphingomyelinase
group_1712	Steroid C26-monooxygenase
sodB_2	Superoxide dismutase [Fe]
group_1903	Toxin
group_2987	Toxin
group_3830	Toxin
group_4276	Transcriptional regulator
group_89	Triacylglycerol lipase
group_2149	tRNA-Ala(tgc)
group_3055	tRNA-Arg(ccg)
group_1144	tRNA-Asn(gtt)
group_1786	tRNA-His(gtg)
group_1133	tRNA-Leu(taa)
group_2535	tRNA-Lys(ttt)
group_2337	tRNA-Pro(cgg)
group_2097	tRNA-Pro(ggg)
group_2775	tRNA-Thr(ggt)
group_2280	tRNA-Trp(cca)
group_1319	tRNA-Val(cac)
group_1837	Type B diterpene cyclase
murF_2	UDP-N-acetylmuramoyl-tripeptide--D-alanyl-D-alanine ligase
group_1941	Universal stress protein
group_4313	Universal stress protein
group_4376	Universal stress protein

## Sheet: Table S8
Supplemental Table S8 The copy number of IS6110 in each strain that was identified from the assemblies.
		Copy number of IS6110 in a strian
SampleID	Lineage	Illumina (I)	I + ONT (N)	I + PacBio (P)	I + N + P
15966	2.2.1	0	1	1	1
17688	2.2.1	0	2	0	0
25474	2.2.1.1	0	0	0	0
29366	2.1	0	0	0	0
37032	2.2.1	0	1	2	2
37446	4.5	0	0	0	0
40543	2.2.1	0	2	1	1
40579	2.2.1	0	0	1	1
40868	2.2.1	0	1	0	0
